1 **Title:** Glutamine metabolism modulates azole susceptibility in *Trypanosoma cruzi* amastigotes

2

3 Peter C. Dumoulin<sup>1</sup>, Joshua Vollrath<sup>1,2</sup>, Jennifer X. Wang<sup>3</sup>, Barbara A. Burleigh<sup>1#</sup>

4

5

6

7

8

9

10 <sup>1</sup>Department of Immunology and Infectious Diseases, Harvard T.H. Chan School of Public  
11 Health, Boston, Massachusetts, USA

12 <sup>2</sup>Institute for Pharmacy and Molecular Biotechnology, Heidelberg University, Im Neuenheimer  
13 Feld 364, 69120 Heidelberg, Germany

14 <sup>3</sup>Harvard Center for Mass Spectrometry, Harvard University, Cambridge, Massachusetts, USA

15 # Address correspondence to [bburleig@hsph.harvard.edu](mailto:bburleig@hsph.harvard.edu)

16

17 **Abstract**

18 The mechanisms underlying resistance of the Chagas disease parasite, *Trypanosoma cruzi*, to  
19 current therapies are not well understood, including the potential role of metabolic heterogeneity  
20 in modulating susceptibility of intracellular amastigotes to trypanocidal compounds. We found  
21 that limiting exogenous glutamine protects actively dividing amastigotes from ergosterol  
22 biosynthesis inhibitors (azoles), independent of parasite growth rate. The antiparasitic properties  
23 of azoles are derived from inhibition of lanosterol 14 $\alpha$ -demethylase (CYP51) in the endogenous  
24 sterol synthesis pathway. We find that carbons from <sup>13</sup>C-glutamine feed into amastigote sterols  
25 and into metabolic intermediates that accumulate upon CYP51 inhibition. Consistent with a  
26 model that decreased flux through the sterol biosynthetic pathway is protective for intracellular  
27 amastigotes exposed to azoles, we find that amastigotes become re-sensitized to azoles  
28 following addition of metabolites upstream of CYP51. Our results highlight the potential role of  
29 metabolic heterogeneity in recalcitrant *T. cruzi* infection, an avenue that is currently  
30 underexplored.

31

## 32 Introduction

33 The goal for treatment of infectious diseases caused by pathogenic bacteria or parasites is to  
34 eliminate the pathogenic microorganism from the infected host. Pathogens that persist following  
35 treatment with an antimicrobial agent may harbor genetic mutations that give rise to resistant  
36 populations. Alternatively, the pathogen may be able to achieve a dormant, non-replicative state  
37 that becomes refractory to the treatment. A third, less explored option, is the impact of metabolic  
38 and environmental heterogeneity on the efficacy of a given antimicrobial agent (Yang et al.,  
39 2017). Factors such as pathogen respiration (Lobritz et al., 2015), ATP levels (Conlon et al.,  
40 2016) and buildup of metabolic intermediates (Dumont et al., 2019) as well as environmental  
41 stressors such as the host immune response (Rowe et al., 2020) can modulate antibiotic  
42 efficacy. Recent work has shown that when the metabolic state and growth rate of microbes are  
43 disentangled, the factor that correlates with antibiotic efficacy is the microbial metabolic state  
44 (Lopatkin et al., 2019). Similarly, standard *in vitro* inhibitory activity of a candidate compound  
45 can be confounded by altered pathogen metabolism due to growth media composition (Hicks et  
46 al., 2018; Pethe et al., 2010) and conversely an understanding of these interactions can  
47 potentiate treatment (Vestergaard et al., 2017). These complex interactions are best understood  
48 in cases of bacterial pathogenesis, but recently, similar trends are apparent in eukaryotic  
49 pathogens (Dumont et al., 2019; McLean and Jacobs-Lorena, 2017; Murithi et al., 2020).

50 A group of single-celled protozoan pathogens with significant global disease burden exhibit  
51 metabolic and growth flexibility (Dumoulin and Burleigh, 2018; McConville et al., 2015;  
52 Saunders et al., 2010; Shah-Simpson et al., 2017) suggesting the potential for interactions with  
53 drug efficacy. In particular, kinetoplasts are a group of early branching, single celled, flagellated  
54 protists that include parasites that cause disease in humans and animals. The kinetoplastid  
55 parasite *Trypanosoma cruzi* is the causative agent of Chagas disease and infects approximately  
56 6 million individuals (WHO, 2015) resulting in substantial morbidity (Bern, 2015), economic

57 burden (Lee et al., 2013) and an estimated 10,000 deaths annually (Stanaway and Roth, 2015).  
58 Parasite transmission is most common through the triatomine insect vector but can also occur  
59 orally, congenitally, by transfusion or transplantation (Bern et al., 2011; Rassi et al., 2010).  
60 Current therapies include treatment with benznidazole or nifurtimox and include undesirable  
61 characteristics such as prolonged treatment and severe adverse events (Castro and Diaz de  
62 Toranzo, 1988; Pinazo et al., 2010; Viotti et al., 2009). During the chronic stages of the disease,  
63 the elimination of parasitemia (Murcia et al., 2010) and the clinical benefit of these therapies  
64 (Morillo et al., 2015; Urbina and Docampo, 2003) are uncertain. Since the continued presence  
65 of the parasite is the main driver of disease (Jones et al., 1993; Tarleton et al., 1997; Zhang and  
66 Tarleton, 1999) a central goal for new therapies is the ability to induce sterile cure.

67 Azole antifungal medications that target the production of endogenous sterols were promising  
68 pre-clinical candidates (Docampo et al., 1981; Docampo and Schmuñis, 1997; Lepesheva et al.,  
69 2011; Urbina, 1997) due to the presence of ergostane-type sterols in *T. cruzi* and an already  
70 establish tolerability and safety profile in humans (Zonios and Bennett, 2008). In clinical trials it  
71 was found that monotherapy with azoles resulted in parasite suppression during treatment that  
72 was not sustained following cessation of therapy (Molina et al., 2014; Morillo et al., 2017;  
73 Torrico et al., 2018) suggesting that parasites are sensitive to therapy even in the absence of  
74 radical cure. Pharmacology and dosage do not appear to influence rebound following therapy  
75 (Khare et al., 2015a). Given the ability of intracellular *T. cruzi* amastigotes to adapt to their  
76 immediate metabolic environment (Caradonna et al., 2013; Dumoulin and Burleigh, 2018; Shah-  
77 Simpson et al., 2017) we sought to determine the extent to which this plasticity influences  
78 parasite susceptibility to ergosterol biosynthesis inhibitors. Here we show that glutamine  
79 metabolism modulates the ability of azoles to eliminate intracellular *T. cruzi* amastigotes,  
80 independent of growth rate. These protected amastigotes can be re-sensitized to azoles when

81 supplied with exogenous sterol synthesis pathway precursors, implicating flux through the sterol  
82 synthesis pathway as a determinant of sensitivity to azoles.

83

## 84 **Results**

### 85 **Exogenous glutamine levels modulate sensitivity of intracellular *T. cruzi* amastigotes to** 86 **lanosterol-14 $\alpha$ -demethylase inhibitors**

87 While spontaneous emergence of latent forms of *T. cruzi* offers one possible explanation for the  
88 failure to achieve parasitological cure following drug treatment (Sánchez-Valdéz et al., 2018),  
89 the role of cellular metabolic heterogeneity in recalcitrant *T. cruzi* infection has not been  
90 explored. In previous work, we showed that proliferation of *T. cruzi* intracellular amastigotes is  
91 responsive to modifications in the exogenous growth medium and that media compositions have  
92 significant and specific interactions with small molecule inhibitors of parasite metabolism, such  
93 as the cytochrome b inhibitor GNF7686 (Dumoulin and Burleigh, 2018). To determine if changes  
94 in the metabolic environment impact the efficacy of clinically relevant compounds (Figure 1—  
95 figure supplement 1), dose-response curves were generated for benznidazole, the first line  
96 therapy for Chagas disease (Bern et al., 2007) and for ketoconazole, a potent inhibitor of  
97 trypanosome sterol synthesis (Lepesheva et al., 2011), in the presence and absence of  
98 supplemental glucose or glutamine (Figure 1A,B). We focused on these nutrients given  
99 knowledge that *T. cruzi* amastigotes are able to metabolize exogenously supplied glucose or  
100 glutamine (Shah-Simpson et al., 2017), and restriction of these exogenous sources slows  
101 amastigote replication without causing lethality (Dumoulin and Burleigh, 2018). Unlike the  
102 majority of immortalized cell lines, primary neonatal human dermal fibroblasts (NHDF/HFF)  
103 used in the present study readily withstands these conditions (Dumoulin and Burleigh, 2018).  
104 Here, we find that the dose-response observed for benznidazole is unaltered by nutrient stress  
105 (Figure 1A). Similarly, intracellular amastigotes exposed to ketoconazole in complete medium or

106 medium lacking glucose exhibited the full range of sensitivity to ketoconazole (Figure 1B). In  
107 contrast, inhibition of intracellular amastigote growth with increasing ketoconazole levels was  
108 greatly diminished when *T. cruzi*-infected monolayers were maintained without supplemental  
109 glutamine (Figure 1B). Analogous results were obtained with other lanosterol-14 $\alpha$ -demethylase  
110 (CYP51) inhibitors, itraconazole, posaconazole and ravuconazole (Figure 1—figure supplement  
111 2A-C).

112 To characterize the mechanism of amastigote growth suppression by ketoconazole and the  
113 protection of parasites from azoles in the absence of glutamine, we performed microscopic  
114 analysis of fixed parasite-infected fibroblast monolayers to count the number of amastigotes per  
115 infected cell (Figure 1C,E) and the proportion of infected host cells present (Figure 1D,F).  
116 Consistent with azoles acting more slowly than benznidazole (Chatelain, 2015; Dumoulin and  
117 Burleigh, 2018), no measurable effects of ketoconazole on intracellular amastigote growth  
118 following 24 hr of exposure to ketoconazole (42 hpi) were seen (Figure 1—figure supplement 3).  
119 With 48 hr of exposure to ketoconazole (5 nM, >IC<sub>99</sub>) (66 hpi) in complete medium or medium  
120 without supplemental glucose, there was a significant reduction in the number of intracellular  
121 amastigotes per infected cell as compared to non-treated controls (Figure 1C) and the  
122 proportion of infected cells (Figure 1D) indicative of parasite death. In contrast, intracellular  
123 amastigotes survived ketoconazole treatment under conditions of glutamine restriction (Figure  
124 1C,D; 66 hpi) and continued to replicate as evidenced by the greater number of amastigotes per  
125 infected cell at 90 hpi (Figure 1E) without a reduction in the proportion of infected cells (Figure  
126 1F). Furthermore, the detection of extracellular trypomastigotes in the supernatants of untreated  
127 cultures and in those treated with ketoconazole in the absence of glutamine at 90 hpi (Figure  
128 1E; symbols), demonstrates that these ketoconazole-treated amastigotes complete the  
129 intracellular cycle in mammalian host cells to produce trypomastigotes.

130 To evaluate the longer-term impact of ketoconazole exposure on intracellular *T. cruzi*  
131 amastigotes cultured in the absence of supplemental glutamine, a clonal outgrowth assay was  
132 utilized to quantitatively measure parasite rebound following treatment (Dumoulin and Burleigh,  
133 2020, 2018). As detection of outgrowth (>14 days) requires surviving parasites to successfully  
134 complete several lytic cycles, this approach distinguishes cytostatic from cidal effects of a test  
135 compound.

136 Exposure of intracellular amastigotes to increasing concentrations of ketoconazole in complete  
137 medium (from 18 hpi - 66 hpi) results in a proportional decrease in clonal outgrowth (Figure 1G),  
138 consistent with irreversible cytotoxicity incurred by exposure to ketoconazole (Goad et al.,  
139 1989). In contrast, no evidence of killing was seen when supplemental glutamine was restricted  
140 during the period of ketoconazole exposure as clonal outgrowth was comparable to vehicle-  
141 treated controls under these conditions (Figure 1G). Extending the ketoconazole exposure time  
142 to 72 hrs does not alter the outcome (Figure 1—figure supplement 4). These results confirm that  
143 intracellular amastigotes are protected from the lethal effects of ketoconazole upon restriction of  
144 supplemental glutamine and further demonstrate protection at the population level as opposed  
145 to the selection of a surviving amastigote sub-population that is intrinsically refractory to the  
146 drug.

147 **Glutamine supplementation sensitizes intracellular *T. cruzi* amastigotes to ketoconazole**  
148 **in a dose-dependent manner**

149 Intracellular *T. cruzi* amastigotes succumb to the toxic effects of azoles when glutamine (2 mM)  
150 is present in the *in vitro* growth medium (Figure 1A-G). Given that standard glutamine  
151 concentrations in culture medium (1-2 mM) are significantly higher than the normal human  
152 plasma physiologic range (Cruzat et al., 2018), supplemental glutamine was titrated to  
153 determine the range in which intracellular amastigotes became sensitized to ketoconazole. In  
154 the absence of drug, the intracellular parasite load increases linearly with the addition of

155 glutamine (Figure 1H), but in the presence of a fixed concentration of ketoconazole (5 nM,  
156 >IC<sub>99</sub>), supplemental glutamine decreased amastigote growth in a dose-dependent manner  
157 (IC<sub>50</sub> of 133.4 μM for glutamine; Figure 1I). Addition of amino acids (proline/histidine), not  
158 present in the base medium, failed to sensitize amastigotes to ketoconazole and impact parasite  
159 growth (Figure 1—figure supplement 5) suggesting that glutamine metabolism in the parasite,  
160 host cell or both, plays a key role in the susceptibility of intracellular *T. cruzi* amastigotes to  
161 azole drugs.

162 Since intracellular *T. cruzi* amastigote growth is markedly reduced under conditions of glutamine  
163 restriction *in vitro*, we cannot rule out the possibility that slowed growth itself might protect  
164 parasites from lethality associated with blocking sterol biosynthesis with azoles. To assess  
165 whether slowed growth is an underlying factor in the protection of intracellular amastigotes from  
166 azole-mediated death, we exploited a small molecule inhibitor of parasite cytochrome b,  
167 GNF7686 (Khare et al., 2015b), which acts cytostatically, to slow amastigote replication in a  
168 dose-dependent manner (Dumoulin and Burleigh, 2018). At 66 hpi both the amastigotes per  
169 infected cell and proportion of infected cells is comparable between protection from glutamine  
170 withdrawal and GNF7686 treatment (Figure 2A,B). However, by 90 hpi when GNF7686 was  
171 applied to slow intracellular amastigote growth in complete medium, the parasites succumbed to  
172 ketoconazole treatment (Figure 2C,D *glut +, keto +, GNF +*) as did the more rapidly proliferating  
173 parasites in the absence of GNF7686 (Figure 2C,D, *glut +, keto +, GNF -*). Parasites cultured in  
174 the absence of supplemental glutamine were protected from the cytotoxic consequences of  
175 ketoconazole in GNF7686-treated (Figure 2C,D, *glut -, keto +, GNF +*) and untreated conditions  
176 (Figure 2C,D, *glut -, keto +, GNF -*). Together with the observation that restriction of  
177 supplemental glucose, another amastigote growth-limiting condition (Dumoulin and Burleigh,  
178 2018), fails to protect intracellular parasites from ketoconazole (Figure 1B-F), these findings  
179 support the conclusion that growth inhibition of *T. cruzi* alone does not account for azole-



180 refractory infection under conditions of glutamine restriction *in vitro*. Furthermore, generation of  
181 reactive oxygen species (ROS) due to glutamine deprivation (Matés et al., 2002) or cytochrome  
182 b inhibition (Dröse and Brandt, 2008; Fridovich, 1978) does not play a role in protection of  
183 intracellular *T. cruzi* amastigotes from azole-mediated cytotoxicity given that antioxidant  
184 supplementation does not alter the susceptibility of amastigotes to azoles under any of the  
185 conditions tested (Figure 2—figure supplement 1A,B). Similar outcomes were achieved when  
186 experiments were conducted under normoxic (~20% O<sub>2</sub>) or hypoxic (1.3% O<sub>2</sub>) conditions  
187 (Figure 2—figure supplement 1C-E). Thus, our results point to dysregulated glutamine  
188 metabolism, rather than slowed parasite growth, in the protection of intracellular *T. cruzi*  
189 amastigotes from death following exposure to azoles.

#### 190 **Glutamine-derived carbons are incorporated into amastigote sterols**

191 *T. cruzi* amastigotes replicate in the cytosol of their mammalian host cells and little is known  
192 regarding the interchange of metabolic precursors and metabolites between the two cells.  
193 However, the fact that the growth rate of these intracellular parasites responds to the availability  
194 of glutamine in the culture medium (Figure 1; and (Dumoulin and Burleigh, 2018)) and that  
195 isolated amastigotes are able to use glutamine as a substrate to fuel oxidative phosphorylation  
196 (Shah-Simpson et al., 2017) highlight the potential for intracellular *T. cruzi* amastigotes to take  
197 up glutamine. In this scenario, the availability of exogenous glutamine could influence the  
198 production of endogenous parasite sterols or pathway intermediates in the intracellular  
199 parasites. By performing metabolic labeling of *T. cruzi*-infected fibroblast monolayers, and  
200 isolation prior to amastigote death (Figure 3—figure supplement 1) a metabolic link between  
201 exogenously supplied glutamine and endogenous sterol synthesis in intracellular amastigotes  
202 was established (Figure 3). Carbons from exogenously supplied L-[<sup>14</sup>C(U)]-glutamine were  
203 found to be incorporated into sterols extracted from isolated intracellular amastigotes following  
204 separation by thin layer chromatography (TLC) (Figure 3A). A single strongly labeled sterol

205 species, or a collection of co-migrating amastigote-derived species, present in the untreated  
206 control, were absent in amastigotes treated with ketoconazole (Figure 3A) providing evidence  
207 that sterol synthesis species downstream of CYP51 incorporate carbons from exogenous  
208 glutamine. This species, or collection of species, co-migrated with the ergosterol standard.  
209 However, *T. cruzi* amastigotes reportedly do not generate canonical ergosterol as the final  
210 species from endogenous sterol synthesis (Gunatilleke et al., 2012; Liendo et al., 1999; Otilie et  
211 al., 2017).

212 To identify individual sterols and the species that incorporate carbons from exogenous  
213 glutamine, we performed GC-MS following metabolic labeling of *T. cruzi* infected cultures with  
214 universally labeled <sup>13</sup>C-glutamine. As expected, carbons from exogenous <sup>13</sup>C-glutamine were  
215 readily incorporated into species downstream of CYP51 (Figure 3B). In the presence of  
216 ketoconazole, when CYP51 is inhibited, these downstream species were absent, and <sup>13</sup>C was  
217 incorporated into lanosterol and ebericol (Figure 3B,C), the two species immediately upstream  
218 of CYP51 in the sterol synthesis pathway (Gunatilleke et al., 2012; Otilie et al., 2017). Unlike  
219 endogenous sterols and synthesis intermediates derived from amastigote metabolism, we did  
220 not identify any incorporation of <sup>13</sup>C-glutamine into host derived, but amastigote-associated,  
221 cholesterol (Figure 3B,C).

222 Therefore, the incorporation of carbons from exogenous glutamine into parasite sterol synthesis  
223 and in the buildup of synthesis intermediates due to CYP51 inhibition suggests that levels of 14-  
224 methylated sterol intermediates are a potential modulator of amastigote susceptibility to azoles.  
225 Optimization of the GC-MS/ISTD sterol quantification of ketoconazole treated amastigotes found  
226 that unlike lanosterol and ebericol, cholesterol levels were variable between biological replicates  
227 (coefficient of variation > 0.3; Figure 3—figure supplement 2) and could not reliably be used for  
228 comparisons between conditions. However, the variation in lanosterol and ebericol recovered  
229 from isolated amastigotes was within an acceptable range (CoV <0.3; Figure 3—figure

230 supplement 2) and are therefore useful for comparison. In all conditions tested, ketoconazole  
231 treatment resulted in an increase in lanosterol in relation to untreated controls and the  
232 generation of ebericol (Figure 3D). We found that in the presence of ketoconazole amastigotes  
233 grown in the absence of glutamine have a reduction in free lanosterol but not ebericol (Figure  
234 3D) suggesting that the amount of free 14-methylated intermediates and potentially the rate of  
235 generation of these intermediates are altered in parasites experiencing glutamine restriction.

### 236 **Supplementation with FPP/Farnesol is sufficient to re-sensitize amastigotes to** 237 **ketoconazole in the absence of glutamine**

238 The generation of 14-methylated sterol precursors has been implicated in the detrimental  
239 phenotypes associated with inactivation of CYP51 in other kinetoplastid protozoan parasites  
240 and yeast (Goad et al., 1989; Kelly et al., 1995; Mukherjee et al., 2019). If flux and/or generation  
241 of these methylated intermediate species modulates the sensitivity of *T. cruzi* amastigotes to  
242 azoles, we reasoned that provision of metabolites downstream of glutamine but upstream of  
243 CYP51 could re-sensitize the parasites to ketoconazole under conditions of glutamine restriction  
244 (Figure 4A). Addition of a cell-permeable form of  $\alpha$ -KG, dimethyl  $\alpha$ -ketoglutarate (di- $\alpha$ -KG),  
245 resulted in a significant reduction of intracellular amastigote growth following treatment with  
246 ketoconazole in the absence of glutamine (Figure 4B,C), while addition of di- $\alpha$ -KG had no effect  
247 on intracellular amastigote growth in glutamine-depleted or replete medium in the absence of  
248 ketoconazole (Figure 4B,C). This result supports the idea that bypassing the loss of exogenous  
249 glutamine by supplementing the medium can re-sensitize amastigotes to ketoconazole.  
250 However, given the potential for conversion of  $\alpha$ -KG to glutamate and then to glutamine, it is  
251 difficult to draw definitive conclusion with regard to metabolite flux. We therefore examined the  
252 possibility that delivery of an upstream sterol precursor would also sensitize amastigotes to  
253 ketoconazole in the absence of glutamine without the potential for conversion to glutamine. In *T.*  
254 *cruzi*, isoprenoid precursors can enter the endogenous sterol synthesis pathway (Cosentino and

255 Agüero, 2014) and in other systems, exogenous supplementation of isoprenoid precursors is  
256 sufficient to chemically rescue blockage of essential metabolic function (Yeh and DeRisi, 2011).  
257 In the absence of ketoconazole, addition of farnesyl pyrophosphate (FPP) (Figure 4D,E and —  
258 figure supplement 1) or farnesol (Figure 4F,G and —figure supplement 1) to the culture medium  
259 had no effect on amastigote growth. In contrast, intracellular amastigotes failed to survive  
260 ketoconazole treatment in glutamine-free medium when FPP (Figure 4D,E and —figure  
261 supplement 1) or farnesol (Figure 4F,G and —figure supplement 1) were present. These  
262 findings suggest that changes to flux through the sterol synthesis pathway is a causative factor  
263 for both protection from and sensitivity to azoles.

264 ***T. cruzi* glutamate dehydrogenase mutants succumb to ketoconazole in the presence and**  
265 **absence of supplemental glutamine**

266 Manipulation of the growth medium, such as glutamine withdrawal or addition of metabolites, is  
267 expected to impact host cell metabolism and either directly and/or indirectly impact parasite  
268 metabolism. To assess the contribution of *T. cruzi* glutamine metabolism in sensitizing  
269 intracellular amastigotes to CYP51-targeting azoles, we took a genetic approach to dysregulate  
270 glutamine metabolism in the parasite. Using a CRISPR/Cas9-mediated approach ((Lander et  
271 al., 2015); Figure 5—figure supplement 1) we disrupted the *T. cruzi* gene encoding  
272 mitochondrial glutamate dehydrogenase (mGDH; TcCLB.509445.39), which is predicted to  
273 function in anaplerosis from glutamine (Cazzulo et al., 1979) and cytosolic (Leroux et al., 2011)  
274 isocitrate dehydrogenase (ciDH; TcCLB.506925.319) that in other systems can drive carbons  
275 from glutamine into the synthesis of sterols 22101433. Consistent with a role for mGDH in  
276 anaplerosis and fueling the TCA cycle and respiratory chain, mGDH-deficient *T. cruzi* isolated  
277 amastigotes fail to maintain ATP levels when glutamine is supplied as the sole carbon source,  
278 whereas glucose was able to sustain these mutants in a manner similar to that observed in WT  
279 parasites (Figure 5A). As compared to WT amastigotes the mGDH-deficient parasites exhibit a

280 growth defect in mammalian cells when cultured in complete medium, but grow similar to WT  
281 amastigotes when cultured in medium without glutamine (Figure 5B). In striking contrast to WT  
282 and cIDH-deficient parasites, mGDH-deficient amastigotes fail to survive exposure to  
283 ketoconazole upon glutamine withdrawal (Figure 5B,C) with few infected cells remaining  
284 following ketoconazole treatment independent of exogenous glutamine status (Figure 5B,C).  
285 Unlike WT amastigotes, mGDH-deficient amastigotes are less sensitive to exogenous glutamine  
286 in the absence of ketoconazole (Figure 5D). In the presence of ketoconazole mGDH-deficient  
287 amastigotes show no relationship between survival and the amount of exogenous glutamine  
288 (Figure 5D). This loss of protection from ketoconazole exhibited by mGDH-disrupted *T. cruzi*  
289 amastigotes illustrates how dysregulation of parasite glutamine metabolism can influence the  
290 susceptibility of these parasites to azoles. Taken together our data show that the ability of  
291 azoles to kill intracellular *T. cruzi* amastigotes can be modulated by altering the extracellular  
292 environment or targeted inhibition of parasite metabolism, which may have broader implications  
293 for the screening and efficacy of candidate anti-trypanosomals.

294

## 295 Discussion

296 Independent of growth rate, the metabolic state of a microorganism can be influenced by its  
297 immediate environment and have an impact of the efficacy of antimicrobials (Lopatkin et al.,  
298 2019). For pathogenic microbes this environment is largely dependent on the status of its host.  
299 Within a host, nutrient utilization and availability vary widely across tissues (Shlomi et al., 2008).  
300 Even within a single tissue, the presence of an inflammatory response shifts the local  
301 metabolism (Kominsky et al., 2010) and in many cases leads to intracellular nutrient restriction  
302 to control pathogen growth (Grohmann et al., 2017). Pathogen growth *in vitro* cannot always  
303 reflect the complete spectrum of metabolic environments present *in vivo* and consequently can  
304 confound interpretations of standard antimicrobial assays (Hicks et al., 2018; Pethe et al.,  
305 2010). These considerations are especially pertinent with regard to *T. cruzi*, a parasite that in its  
306 mammalian host replicates intracellularly in diverse tissues and persists for the lifetime of the  
307 host, exposing the parasite to an immune response that suppresses parasitemia without sterile  
308 cure (Lewis et al., 2015).

309 Recent clinical trials investigating the efficacy of azoles (CYP51 inhibitors) to eliminate *T. cruzi*  
310 parasitemia resulted in an initial elimination of peripheral parasitemia that unlike benznidazole  
311 was not maintained after cessation of therapy (Molina et al., 2014; Morillo et al., 2017; Torrico et  
312 al., 2018). The anti-parasitic activity of azoles without sterile cure suggests the possibility that  
313 heterogeneous environments and/or distinct populations of parasites within a single host may  
314 underlie treatment failure. We examined the influence of metabolic environment on the *in vitro*  
315 potency of benznidazole, the current first line therapy, and azoles. Benznidazole remained  
316 equally potent in all conditions tested, showing that its activity does not interact with either the  
317 slowed growth of amastigotes in these conditions or the specific nutrients tested. Unlike  
318 benznidazole, the activity of azoles was found to be affected by the absence of glutamine, but  
319 not glucose, in the medium. Rather than a shift in traditionally measured IC<sub>50</sub>, this change is

320 characterized by the inability of azoles to cause radical growth reduction at all concentrations  
321 tested, potentially through drug resistance, tolerance or kill kinetics. However, this protection is  
322 not explained by increased time to kill since increasing the time of exposure to ketoconazole did  
323 not result in amastigote death in the absence of glutamine. Rather we found that intracellular  
324 amastigotes continued to proliferate in the presence of ketoconazole when glutamine is  
325 restricted and are competent to complete the lytic cycle by undergoing differentiation to  
326 trypomastigotes that egress from the host cell.

327 With regard to growth rate itself influencing azole efficacy, we found that slowing amastigote  
328 growth, using an inhibitor (GNF7686) of parasite cytochrome b was able to delay but not  
329 prevent amastigote death due to azoles in the absence of supplemental glutamine. In a similar  
330 scenario, more slowly growing *T. cruzi* isolates appear less susceptible to azoles in a single  
331 time point growth inhibition assay, yet more rapidly dividing strains can still outgrow following  
332 treatment (MacLean et al., 2018). An alternative explanation for parasite persistence in the  
333 presence of azoles is a complete cessation of amastigote division. While the nature of  
334 dormancy in *T. cruzi* remains under investigation (Sánchez-Valdéz et al., 2018), we report here  
335 a protective mechanism that allows for amastigote proliferation in the presence of drug at the  
336 population level. Since, slowed growth appears to induce tolerance to azoles but is insufficient  
337 to provide resistance; we investigated potential mechanisms to explain the protection from  
338 azoles mediated specifically by glutamine restriction.

339 Glutamine is the most abundant amino acid in the human body and has a wide intracellular  
340 distribution between tissues (Cruzat et al., 2018). Standard *in vitro* growth media compositions  
341 contain supraphysiologic amounts of glutamine to allow for the sustained growth of rapidly  
342 dividing cells. We found that *in vitro*, amastigotes do not become entirely sensitized to  
343 ketoconazole until glutamine is supplemented to levels higher than those found in plasma.  
344 Additionally, during inflammation in general, intracellular glutamine pools can become depleted

345 in certain tissues as release rates exceed synthesis (Karinch et al., 2001). Data from this study  
346 show that *in vitro* growth conditions may belie the variable efficacy of candidate anti-parasitic  
347 compounds and offer complementary approaches to better prioritize new candidates.

348 Our data and others show that azoles act only after several rounds of parasite division, likely  
349 through the gradual depletion of sterol end products and/or the buildup of 14-methylated sterol  
350 synthesis intermediates. Similar to fungal species, *T. cruzi* endogenously synthesized  
351 ergostane-type sterols. The fungal/parasite cytochrome P450 14 $\alpha$ -demethylase (CYP51/Erg11)  
352 is involved in the synthesis of ergosterol and is the target of azole drugs. Drug resistance to  
353 azoles observed in fungal pathogenesis include mutations in CYP51 (Howard et al., 2009), drug  
354 efflux (Prasad and Rawal, 2014), selection for sterol auxotrophy (Hazen et al., 2005) or  
355 suppressor mutations that alter the composition of 14-methylated sterol synthesis intermediates  
356 (Kelly et al., 1995). Target site or suppressor mutations cannot explain protection mediated by  
357 glutamine restriction in *T. cruzi* amastigotes because we found that amastigotes are protected  
358 as a population, which occurs rapidly within a single lytic cycle. Under these conditions,  
359 amastigotes are not exposed to prolonged selection. Protection from azoles mediated by  
360 glutamine withdrawal is likely not due to a decrease in activity due to drug efflux, since the  
361 generation of sterols downstream of CYP51 is abolished in the absence of glutamine,  
362 demonstrating that the activity of ketoconazole is unchanged. These data demonstrate that  
363 protection may not be mediated by changes to the activity or sensitivity of CYP51 to azoles but  
364 rather changes to the consequences of CYP51 inhibition.

365 Increased membrane fluidity and heat sensitivity seen in *Leishmania major* CYP51 knockouts  
366 (Xu et al., 2014) but not in knockouts of sterol methyltransferase (Mukherjee et al., 2019)  
367 suggests that accumulation of 14-methylated sterols rather than the absence in ergosterol  
368 effects parasite viability. We found that the carbons from glutamine enter the endogenous sterol  
369 synthesis pathway in *T. cruzi* amastigotes and are incorporated into the 14-methylated sterol



370 synthesis intermediates lanosterol and ebericol. The incorporation of these carbons into  
371 amastigote sterols suggests that removal of glutamine has the potential to diminish flux through  
372 the sterol synthesis pathway. While lanosterol and ebericol both increase in the presence of  
373 ketoconazole, the relative amount of lanosterol is less when amastigotes are grown in the  
374 absence of glutamine. Since we have only measured free sterols in isolated *T. cruzi*  
375 amastigotes, it is possible that sterols or their synthesis intermediates are esterified (Pereira et  
376 al., 2018; Taylor and Parks, 1978) or exported from the amastigote and therefore not detected  
377 using these methods. In line with glutamine modulating flux through the sterol biosynthesis  
378 pathway, addition of metabolites upstream of CYP51 ( $\alpha$ -KG, FPP, farnesol) were shown to re-  
379 sensitize amastigotes to the cytotoxic effects of ketoconazole in the absence of glutamine.  
380 Taken together these data show that carbons derived from glutamine may determine flux  
381 through the endogenous sterol synthesis pathway in amastigotes and influence the buildup of  
382 14-methylated species.

383 Within the context of our proposed model, our finding that mGDH-deficient *T. cruzi* amastigotes  
384 fail to survive exposure to ketoconazole upon glutamine restriction suggests that mutant  
385 parasites are unable to reduce flux of carbons into the sterol synthesis pathway in the absence  
386 of glutamine. Although the precise contribution of parasite and host metabolism in modulating  
387 sterol biosynthesis in intracellular amastigotes is still undetermined, our data clearly indicate that  
388 parasite glutamine metabolism plays a critical role in sensitizing *T. cruzi* to azoles.

389 In summary, we find that the sensitivity of intracellular amastigotes to azoles is modulated by  
390 their glutamine metabolism, characterized by changes in flux through the sterol synthesis  
391 pathway. These observations have implications for *T. cruzi* antimicrobial prioritization and  
392 further evidence that the metabolic state of a microorganism is an important consideration for  
393 determining drug susceptibility. Even though the identification of new targets for antiparasitic  
394 compounds (Khare et al., 2016, 2015b) is promising, a better understanding of parasite

395 metabolism and reasons for failure of prior candidates has the potential to aid in the  
396 prioritization of these potential therapies. In addition, the ability to modulate drug susceptibility  
397 through nutrient availability *in vitro* suggests that nutrient supplementation *in vivo* should be  
398 explored as a potential combination therapy.

399

400

## 401 **Materials and Methods**

### 402 **Mammalian cell culture**

403 Mammalian cells were maintained at 37°C in a 5% CO<sub>2</sub> incubator. Dulbecco's modified Eagle  
404 medium (DMEM; HyClone, Logan, Utah) supplemented with 10% FBS (Gibco, Waltham,  
405 Massachusetts), 25 mM glucose, 2 mM L-glutamine and 100U/mL penicillin-streptomycin was  
406 used for propagated for uninfected cultures (DMEM-10). Unless stated otherwise, cultures  
407 infected with *Trypanosoma cruzi* were maintained in DMEM with 2% FBS (DMEM-2). Normal  
408 Human Neonatal Dermal Fibroblasts (NHDF; Lonza, Basel, Switzerland) were passaged prior to  
409 reaching confluence.

### 410 **Parasite maintenance**

411 Tulahuén LacZ clone C4 (Tula-βgal), PRA-330 (ATCC, Manassas, Virginia) was obtained  
412 directly and passaged weekly in LLC-MK<sub>2</sub>, CCL-7 (ATCC, Manassas, Virginia) cells (Buckner et  
413 al., 1996). Trypomastigotes were prepared by collecting the supernatant from infected cultures  
414 and centrifuging for 10 min at 2,060 x g followed by incubation at 37°C for >2 hours to allow for  
415 trypomastigotes to swim from the pellet. After incubation the supernatant containing  
416 trypomastigotes was collected and washed in DMEM-2, enumerated using a Neubauer chamber  
417 and used for subsequent infections.

## 418 **Quantification of parasite load by luminescence**

419 Tula-βgal parasite load was measured using luminescence as described previously (Caradonna  
420 et al., 2013; Shah-Simpson et al., 2017). One day prior to infection NHDFs were seeded in 384-  
421 well plates (Corning, Corning, New York) at a density of 1,500 cells per well and allowed to  
422 attach. Purified trypanomastigotes were added at a multiplicity of infection (MOI) of 1.25 and  
423 allowed to invade for 2 hours, followed by two washes with PBS and subsequent addition of  
424 DMEM-2 without phenol red. Treatments were initiated at 18 hours post infection (hpi) to avoid  
425 any potential impacts of trypanomastigote invasion and/or differentiation. At the indicated time  
426 points growth media was removed and 10 μl Beta-Glo (Promega, Madison, Wisconsin) was  
427 added per well. Plates were incubated for >30 min at room-temperature to allow the reaction to  
428 reach equilibrium and read using an EnVision plate reader (PerkinElmer, Waltham,  
429 Massachusetts). Luminescence from uninfected wells was determined for each treatment and  
430 subtracted from infected wells to account for signal not derived from parasites.

## 431 **Compound and supplement stocks**

432 Compounds were purchased and diluted to stock concentrations: Ketoconazole (Enzo,  
433 Farmingdale, New York) 15 mM stock in DMSO, Ravuconazole (Sigma, St. Louis, Missouri) 15  
434 mM DMSO, Itraconazole (BioVision, Milpitas, California) 15 mM DMSO, GNF7686 (Vitas-M  
435 Laboratory, Champaign, Illinois) 5 mM stock in DMSO, FPP (Sigma, St. Louis, Missouri) 2.3 mM  
436 stock in methanol, Farnesol (Sigma, St. Louis, Missouri) 100 mM in ethanol, NAC (Sigma, St.  
437 Louis, Missouri) 200 mM in DMEM base, Glutathione (Sigma, St. Louis, Missouri) 162 mM in  
438 media.

## 439 **Microscopy**

440 Host cells were seeded one day prior to infection on coverslips (EMS, Hatfield, Pennsylvania) in  
441 24-well plates at a density of  $4 \times 10^4$  cells per well. Cells were infected for 2 hours at a MOI of 2

442 and subsequently washed twice with PBS followed by addition of DMEM-2. Coverslips were  
443 fixed in 1% PFA-PBS and stained in a 0.1% Triton X-100–PBS solution containing 100 ng/ml  
444 DAPI (Sigma, St. Louis, Missouri) for 5 min. After staining coverslips were washed with PBS  
445 and mounted with ProLong Antifade (Thermo Fisher, Waltham, Massachusetts) on glass slides.  
446 Amastigotes were counted using a Nikon eclipse TE300. Amastigotes per infected host cell and  
447 the number of infected host cells per microscopic field were recorded.

#### 448 **Western Blot**

449 Uninfected cells were lysed in 1 mL M-PER Mammalian Protein Extraction Reagent (Thermo  
450 Fisher, Waltham, Massachusetts) directly in culture wells and boiled for 10 minutes. Soluble  
451 lysate (50 µg) was loaded onto a 10% Mini-Protean TGX Gel (Bio-Rad, Hercules, CA). Proteins  
452 were transferred to a nitrocellulose membrane and blocked with a 1:1 dilution of SEA BLOCK  
453 (Thermo Fisher, Waltham, Massachusetts):PBS overnight at 4°C. The membrane was probed in  
454 blocking buffer with anti-Hif1a EPR16897 (1:1,500) (Abcam, Cambridge, MA) and anti-βactin  
455 (Sigma, St. Louis, Missouri) (1:1,000) for 1h at room temperature in hybridization tubes. After  
456 probing the membrane was washed in 1X PBS for 30 minutes, replacing PBS every 5 minutes  
457 for a total of 6 washes. Secondary antibodies, anti-mouse DyLight 680 (Cell Signaling, Dancers,  
458 MA) (1:15,000) and anti-rabbit Dylight 800 (Thermo Fisher, Waltham, Massachusetts)  
459 (1:10,000) were added and incubated for 1 hour at room temperature. The membrane was  
460 visualized using a LI-COR imaging system (LI-COR, Lincoln, NE).

#### 461 **Gene Disruption**

462 Gene disruption was accomplished using a homology directed repair, Cas9 mediated system  
463 modified from (Lander et al., 2015). The Cas9/gRNA expression construct pTREX-n-Cas9 was  
464 first modified using the Q5 mutagenesis kit (NEB, Ipswich, Massachusetts), primers 5'-  
465 CCCAAAAAGAAAAGGAAGGTTGATTAGAAGCTTATCGATACCGTCGAC-3' and 5'-

466 GTCCTCGACTTTTCGCTTCTTTTTTCGGGTCGCCTCCCAGCTGAGA-3', to remove the GFP  
467 and HA tags from Cas9 and maintain the SV40-NLS. Guide RNA design used the EuPaGDT  
468 system (Peng and Tarleton, 2015). A guide RNA targeting sequence specific to GFP and  
469 scaffolding were amplified by PCR, 5'- TATAGGATCCCAGATTGTGTGGACAGGTAA-3' and 5'  
470 -CAGTGGATCCAAAAAGCACCGACTCGGTG-3', using pUC\_sgRNA as a template as  
471 described in (Lander et al., 2015) and cloned into pTREX-n-Cas9-noTags using BamHI.  
472 Mutations to the specificity of guides in pTREX-n-Cas9-noTags was performed using a Q5  
473 mutagenesis kit (NEB, Ipswich, Massachusetts). Guides targeting the mitochondrial glutamate  
474 dehydrogenase (mGDH, TcCLB.509445.39) were inserted using 5'-  
475 TGTTACACGGGTTTTAGAGCTAGAAATAGC-3'/5'-  
476 AAGGCCGTAGGGATCCACTAGAACTCTTG-3' for g195 and 5'-  
477 CAAAGGCCGTGTTTTAGAGCTAGAAATAGC-3'/5'-  
478 TTACACGGAGGGATCCACTAGAACTCTTG-3' for g216. Guides targeting the cytosolic  
479 isocitrate dehydrogenase (ciDH, TcCLB.506925.319) were inserted using 5'-  
480 GAGCCTCGTCGTTTTAGAGCTAGAAATAGC-3'/5'-  
481 GTGTAAGGGAGGATCCACTAGAACTCTTG-3' for g110rc and 5'-  
482 GAAGCAGATGGTTTTAGAGCTAGAAATAGC-3'/5'-  
483 AAGTTGAACTGGATCCACTAGAACTCTTG-3' for g110. Donor DNA containing drug resistant  
484 was generated by PCR using ultramers with 100bp homology to regions flanking the predicted  
485 Cas9 cut site and an in frame P2A ribosomal skip peptide.

486 Epimastigotes were grown at 27°C in liver infusion tryptose (LIT) containing 10% FBS. Log-  
487 phase epimastigotes were transfected simultaneously with pTREX-Cas9-gRNA plasmids and  
488 donor DNA using an Amaxa nucleofactor, program U-33 in Tb-BSF (Schumann Burkard et al.,  
489 2011). Transfected epimastigotes were allowed to recover for 24 hours and subsequently  
490 cloned in the presence of drug corresponding to the resistance marker present in the donor

491 DNA. Clones were screening using primers, 5'-ATGCGGCGTGTGGTTATTATGG-3'/5'-  
492 TGGCTCCTTTAAAAGAAGCGCG-3' (mGDH) and 5'-CGTGACAAAACGGACGATCAGG-3'/5'-  
493 TTCTGATCCAGTTTGCCCGAT-3' (cIDH) that flank the insertion site.

#### 494 **Sterol Extraction**

495 The method for extraction of sterols was based on protocols described in (Sharma et al., 2017).  
496 Extraction occurred in glass PYREX tubes (Corning, Corning, New York) and all solvents used  
497 were HPLC grade or higher. Lipids were first extracted three times from cell pellets using C:M  
498 (2:1, v/v) and centrifuged each time at 1,800 x g for 15 min at 4°C followed by collection of the  
499 supernatant in new tubes. The supernatant was dried under a constant stream of N<sub>2</sub> and the  
500 resulting material was subjected to a Folch's partitioning (4:2:1.5, C:M:W). The lower phase was  
501 removed, dried under N<sub>2</sub> and re-suspended in chloroform, passed over a silica 60 column and  
502 eluted with chloroform.

#### 503 **Radiolabeling and thin layer chromatography**

504 For radiolabeling 25μCi/condition of universally labeled <sup>14</sup>C-glutamine (Moravek, Brea,  
505 California) with a specific activity of 281 mCi/mmol was added to DMEM-2 with 0.5 mM  
506 unlabeled glutamine. Infection, amastigote isolation and sterol extraction were carried out as  
507 described. Separation of species by thin layer chromatography (TLC) was accomplished  
508 through a protocol modified from (Andrade-Neto et al., 2011). Silica gel on TLC aluminum foils  
509 (Honeywell Fluka, Charlotte North Carolina) were pre-conditioned with a silver nitrate (1% w/v)  
510 methanol solution and allowed to dry. Samples and standards were added to TLC plates and  
511 first placed in a tank containing a mobile phase of hexane:ethyl ether:acetic acid (60:40:1) and  
512 solvent was allowed to reach half way up the plate. Subsequently plates were placed in a  
513 second tank with a mobile phase of hexane:chloroform:acetic acid (80:20:1) until the mobile  
514 phase reached near the top of the plate. Plates were exposed for seven days to

515 phosphorimager screens and imaged using a Typhoon Phosphorimager-FLA7000 (GE  
516 Healthcare, Chicago, Illinois). Prior to charring at 100°C for 2-5 min plates were soaked in a  
517 ferric chloride water solution (50mg FeCl<sub>3</sub>/100mL) with 5% acetic acid and 5% sulfuric acid  
518 (Lowry, 1968).

#### 519 **GC-MS**

520 GC/MS analysis was performed on a Thermo Scientific TRACE 1310 Gas Chromatograph  
521 equipped with a Thermo Scientific Q Exactive Orbitrap mass spectrometry system. 50µL of the  
522 (BSTFA+10% TMCS)/pyridine (5/1 v/v) was added into each vial, vortexed well, and heated at  
523 70°C for 30 min. 1 µL sample was injected into a Thermo fused-silica capillary column of cross-  
524 linked TG-5SILMS (30 m x 0.25 mm x 0.25 µm). The GC conditions were as follows: inlet and  
525 transfer line temperatures, 290°C; oven temperature program, 50°C for 0 min, 24°C/min to  
526 325°C for 5.7 min; inlet helium carrier gas flow rate, 1 mL/min; split ratio, 5. The electron impact  
527 (EI)-MS conditions were as follows: ion source temperature, 310°C; full scan m/z range, 30 -  
528 750 Da; resolution, 60,000; AGC target, 1e6; maximum IT, 200ms. Data were acquired and  
529 analyzed with Thermo TraceFinder 4.1 software package. Standards for cholesterol, ergosterol,  
530 lanosterol, episterol and zymosterol were used for identification. Universal <sup>13</sup>C-glutamine was  
531 re-suspended to a stock concentration of 200 mM in water (Cambridge Isotope Labs,  
532 Tewksbury, Massachusetts). Prior to sterol extraction sitosterol-d7 (Avanti Polar Lipids,  
533 Alabaster, Alabama) was add as an internal standard (ISTD) at 1.12 µg/2e7 isolated  
534 amastigotes.

#### 535 **Amastigote Isolation**

536 Infected monolayers were washed 2 times with PBS and cell detachment was achieved using a  
537 sterol free dissociation reagent, Accumax (Innovative Cell Technologies, San Diego, California).  
538 Cell suspensions were washed 2 times with PBS by centrifugation at 700 x g for 10min at 4°C.

539 The resulting cell pellets were lysed by passage through a 28-gauge needle or using the  
540 Miltenyi GentleMACS dissociator (M tubes, Protein\_01 protocol). Lysate was passed over a PD-  
541 10 column (GE Healthcare, Chicago, Illinois) equilibrated with PBS. Eluted parasites were  
542 washed three times in PBS by centrifugation at 2300 x g at 4°C.

### 543 **Clonal outgrowth**

544 Measurement of clonal outgrowth utilized a modified protocol from (Dumoulin and Burleigh,  
545 2018) to allow for detection by luminescence. Host cells were seeded in 384 well plates and 25  
546 trypomastigotes per well were allowed to invade for 2 hours, followed by 2 washes with PBS to  
547 removed uninvaded trypomastigotes. Treatments were initiated at 18 hpi and wells were  
548 washed at 66 hpi twice with PBS followed by addition of DMEM-2. Cultures were allowed to  
549 grow for 14 days and subsequently measured for presence of parasites by luminescence as  
550 described previously.

### 551 **ATP assay**

552 Isolated amastigotes were re-suspended in KHB as described (Shah-Simpson et al., 2017).  
553 After isolation, 8e5 amastigotes per well were added to 96 well plates. Where indicated glucose  
554 was supplemented to a final concentration of 25 mM, glutamine at 2 mM and GNF7686 at 2.5  
555 µM. Amastigotes were incubated at 37°C for 72 hours followed by lysis and measurement of  
556 luminescence using the ATPlite assay (Perkin Elmer, Waltham, MA).

557



558 **Figure Legends**

559 **Figure 1: A lack of supplemental glutamine in growth medium protects intracellular *T.***  
560 ***cruzi* amastigotes from the cytotoxic effects of ketoconazole**

561 **(A)** Dose response curves at 66 hpi of benznidazole and **(B)** ketoconazole treatment, in the  
562 indicated media compositions, normalized to the largest mean in each data set. Mean (circles)  
563 and standard deviation show (n=4). **(C)** Microscopic counts at 66 hpi of the number of  
564 amastigotes per infected host cell (n=40), medians indicated, and **(D)** the number of infected  
565 cells per field (n=20), mean and standard deviations shown. **(E)** Microscopic counts at 90 hpi of  
566 the number of amastigotes per infected host cell (n=40), medians indicated, and **(F)** the number  
567 of infected cells per field (n=20), mean and standard deviations shown. Cartoons at top of graph  
568 indicate conditions where extracellular trypomastigotes are visible in the culture supernatant.  
569 **(G)** Detection of clonal outgrowth 14 days after the indicated treatments, normalized to DMSO  
570 (vehicle) treatment. Mean and standard deviation shown, circles indicates values of two  
571 independent experiments with 28 wells used per treatment within an experiment. **(H)** Dose  
572 response curves of glutamine in the presence of DMSO or **(I)** ketoconazole (5 nM). Mean and  
573 standard deviation shown (n=3). Statistical comparisons between medians (C,E) were  
574 performed using a Kruskal-Wallis test with Dunn's multiple comparisons test (\*\*\*\*p<0.0001,  
575 ns=not significant). Comparisons of means (D,F) were performed using a one-way ANOVA and  
576 Bonferroni's multiple comparisons test (\*\*\*\*p<0.0001, ns=not significant). Comparisons of  
577 means from outgrowth (G) was performed using a two-way ANOVA with Dunnett's multiple  
578 comparisons test (\*p<0.05, \*\*p<0.01).

579 **Figure 1 –figure supplement 1: Experimental schematic for *in vitro* infection and readouts**

580 Trypomastigotes (*Tula-βgal*) are incubated with mammalian host cells for 2 hours to allow  
581 invasion. Remaining extracellular parasites are subsequently removed by thorough rinsing of

582 monolayers. Internalized parasites undergo differentiation into mature amastigotes and any  
583 treatments or media adjustments are initiated at 18 hpi prior to the first amastigote division. At  
584 indicated time points post-infection (e.g. 42-90 hpi), infected cultures have one of several fates  
585 depending on the experiment, as illustrated and described in detail in the Methods.

586 **Figure 1 –figure supplement 2: Sensitivity to additional azole drugs is modulated by**  
587 **glutamine**

588 **(A)** Dose response curves of itraconazole, **(B)** posaconazole, and **(C)** ravuconazole treatment  
589 measured at 66 hpi. Treatment including media compositions are indicated and growth is  
590 normalized to the largest mean in each data set. Mean (circles) and standard deviation show  
591 (n=4).

592 **Figure 1 –figure supplement 3: Ketoconazole does not prohibit amastigote proliferation**  
593 **at 42 hpi**

594 Microscopic counts of intracellular amastigotes per host cell at 42 hpi following treatment at 18  
595 hpi with ketoconazole (5 nM) under the indicated conditions.

596 **Figure 1 –figure supplement 4: Increased exposure to ketoconazole does not change**  
597 **clonal outgrowth**

598 Detection of clonal outgrowth 14 days after the indicated treatments, normalized to DMSO  
599 treatment. A pulse length of 48 hr (18 hpi – 66 hpi) or 72 hr (18 hpi – 90hpi) does not alter  
600 sensitivity to ketoconazole in complete medium or medium without glutamine.

601 **Figure 1 –figure supplement 5: Proline or Histidine supplementation do not sensitize**  
602 **amastigotes to ketoconazole in the absence of glutamine**

603 Dose response curves of proline/histidine in the absence of supplemental glutamine (n=3).

604 **Figure 2: Slowed amastigote growth delays but does not prevent the cidal effects of**  
605 **ketoconazole**

606 **(A)** Microscopic counts of amastigotes per host cell (n=40) and **(B)** proportion of infected cells  
607 (n=20) at 66 hpi following treatment at 18 hpi with ketoconazole (5 nM) and/or GNF7686 (150  
608 nM) under the indicated conditions. **(C)** Microscopic counts of amastigotes per host cell (n=40)  
609 and **(D)** proportion of infected cells (n=20) at 90 hpi following treatment at 18 hpi with  
610 ketoconazole (5 nM) and/or GNF7686 (150 nM) under the indicated conditions. Statistical  
611 comparisons between medians (A,C) were performed using a Kruskal-Wallis test with Dunn's  
612 multiple comparisons test (\*\*\*\*p<0.0001, \*\*p<0.01, ns=not significant). Comparisons of means  
613 (B,D) were performed using a one-way ANOVA and Bonferroni's multiple comparisons test  
614 (\*\*\*\*p<0.0001, \*p<0.05, ns=not significant).

615 **Figure 2 –figure supplement 1: Antioxidants or hypoxia do not alter sensitivity of**  
616 **amastigotes from ketoconazole**

617 **(A)** Dose response of N-acetylcysteine and **(B)** glutathione measured at 66 hpi in the indicated  
618 treatment conditions. Mean and standard deviations are show (n=2). **(C)** Microscopic counts of  
619 the number of amastigotes per infected host cell, mean indicated, (n=40) and **(D)** the number of  
620 infected cells per 20 fields, mean and standard deviation shown (n=3). Growth in complete  
621 medium under normoxia (20% atmospheric oxygen) or hypoxia (1.3% oxygen) and  
622 ketoconazole (5 nM) where indicated. **(E)** Western blot of uninfected whole host cell lysate.  
623 Hif1 $\alpha$  is induced under hypoxia and in the presence of DMOG (0.8 mM for 6 hours) as a positive  
624 control. Statistical comparisons between medians (C) were performed using a Kruskal-Wallis  
625 test with Dunn's multiple comparisons test (\*\*\*\*p<0.0001, ns=not significant). Comparisons of  
626 means (D) were performed using a one-way ANOVA and Bonferroni's multiple comparisons test  
627 (\*\*\*\*p<0.0001, ns=not significant).

628 **Figure 3: Glutamine derived carbons are incorporated into amastigote sterols and**  
629 **influence the buildup of lanosterol**

630 **(A)** Thin layer chromatography (TLC) of sterols extracted from amastigotes isolated at 52 hpi  
631 with or without ketoconazole (5 nM) treatment. Cultures were spiked with 25 uCi universally  
632 labeled  $^{14}\text{C}$ -glutamine per condition at 18 hpi. Charred TLC plate for total carbons (left) and  
633 developed phosphorimager screen (right) for radioactivity with non-radioactive chemical  
634 standards are shown. **(B)** Table of detectable endogenous isolated amastigote sterol species  
635 and the percentage of  $^{13}\text{C}$ -glutamine incorporation. **(C)** Chromatogram from GC-MS detection of  
636 samples in panel B. Host cell derived cholesterol is seen at retention time 12.21, ebericol at  
637 13.30, lanosterol at 13.04 and the internal standard at 12.98. **(D)** Quantification, using an  
638 internal standard, of lanosterol and ebericol in isolated amastigotes (52 hpi) following treatment  
639 with ketoconazole (5 nM) at 18 hpi with or without glutamine (2 mM). Mean and standard  
640 deviation shown of independent treatments, infections and amastigote isolations (n=2).  
641 Statistical comparisons are made using a Student's t-test (\*p<0.05, ns=not significant).

642 **Figure 3 –figure supplement 1: Time course establishes 52 hpi as optimal time point to**  
643 **harvest intracellular amastigotes following ketoconazole treatment**

644 Time course following treatment with ketoconazole (5 nM) in complete media. Amastigotes per  
645 infected host cell (n=40) and infected cells per 20 fields are shown. 52 hpi identified as  
646 maximum time of ketoconazole exposure prior to measurable loss of intracellular amastigotes.

647 **Figure 3 –figure supplement 2: Endogenous lanosterol and ebericol but not host derived**  
648 **cholesterol are reliable quantifiable from isolated intracellular amastigotes**

649 Isolated amastigotes (52 hpi) were prepared on three independent occasions (biological) and  
650 each isolation was extracted three separate times (sterol extraction). The coefficient of variation

651 of standard normalized area (GC-MS) was determined, means indicated. Variation in  
652 cholesterol between biological replicates prohibits reliable quantification.

653 **Figure 4: Addition of metabolites can re-sensitize intracellular *T. cruzi* amastigotes to**  
654 **ketoconazole in the absence of glutamine**

655 **(A)** Schematic of endogenous sterol synthesis. Dash lined arrows indicate omission of steps for  
656 simplicity. **(B)** Microscopic counts of amastigotes per infected cell (n=40) and **(C)** infected cells  
657 per field (n=20) at 90 hpi with  $\alpha$ KG (10 mM) supplemented where indicated. Microscopic counts  
658 of **(D)** amastigotes per infected cell (n=40) and **(E)** infected cells per field (n=20) at 90 hpi with  
659 FPP supplemented where indicated. Stars indicated conditions where parasites could not be  
660 found. **(F)** Microscopic counts of amastigotes per infected cell (n=40) and **(G)** infected cells per  
661 field (n=20) at 90 hpi with farnesol supplemented where indicated. Statistical comparisons  
662 between medians (B,D,F) were performed using a Kruskal-Wallis test with Dunn's multiple  
663 comparisons test (\*\*\*\*p<0.0001, \*\*\*p<0.001, \*p<0.05, ns=not significant). Comparisons of  
664 means (C,E,G) were performed using a one-way ANOVA and Bonferroni's multiple comparisons  
665 test (\*\*\*\*p<0.0001, ns=not significant).

666 **Figure 4 –figure supplement 1: FPP and farnesol re-sensitize amastigotes to**  
667 **ketoconazole by 66 hpi**

668 **(A)** Microscopic counts of amastigotes per infected cell (n=40) and **(B)** infected cells per field  
669 (n=20) at 66 hpi with FPP supplemented where indicated. **(C)** Microscopic counts of  
670 amastigotes per infected cell (n=40) and **(D)** infected cells per field (n=20) at 66 hpi with  
671 farnesol supplemented where indicated. Statistical comparisons between medians (A,C) were  
672 performed using a Kruskal-Wallis test with Dunn's multiple comparisons test (\*\*\*\*p<0.0001,  
673 ns=not significant). Comparisons of means (B,D) were performed using a one-way ANOVA and  
674 Bonferroni's multiple comparisons test (\*\*\*\*p<0.0001, ns=not significant).

675 **Figure 5: Amastigote glutamine metabolism alters sensitivity to ketoconazole**

676 **(A)** Quantification of the levels of ATP from isolated amastigotes in carbon free buffer  
677 supplemented with glucose or glutamine. Comparisons of means, to supplemented conditions  
678 within a given parasite line, were performed using a one-way ANOVA and Bonferroni's multiple  
679 comparisons test ( $p < 0.0001 = ****$ , ns=not significant). **(B)** Microscopic counts of amastigotes per  
680 infected host cell ( $n=40$ ) and **(C)** the number of infected cells per field ( $n=20$ ) at 66 hpi.  
681 Statistical comparisons between medians (B) were performed using a Kruskal-Wallis test with  
682 Dunn's multiple comparisons test ( $**p < 0.01$ ,  $***p < 0.001$ , ns=not significant). Comparisons of  
683 means (C) were performed using a one-way ANOVA and Bonferroni's multiple comparisons test  
684 ( $****p < 0.0001$ , ns=not significant). **(D)** Dose response curves of glutamine in the presence of  
685 DMSO or 5 nM ketoconazole. Mean and standard deviation shown ( $n=3$ ). Tula- $\beta$ gal is shown in  
686 unfilled circles and Tula- $\beta$ gal $\Delta$ mGDH is shown with filled circles.

687 **Figure 5 –figure supplement 1: Verification of gene disruptions**

688 **(A)** Schematic for the generation of Cas9 mediated double strand breaks (black star) and  
689 recombination using homology directed repair. **(B)** PCR verification of selected clones to verify  
690 target integration.

691

692

693 **Acknowledgements**

694 We wish to acknowledge the ICCB-Longwood Screening Facility at Harvard Medical School for  
695 help with optimization of plate-based luminescence assays. We also thank Dr. Igor C. Almeida  
696 and Dr. Lucas Pagura for help with sterol extraction and thin layer chromatography protocols.

697 This work was funded by NIH NIAID R21 AI146815-01 awarded to B.A.B. and American Heart  
698 Association Founders Affiliate Postdoctoral fellowship 19POST34380209 awarded to P.C.D.

699

700 **Competing Interests: None**

701

## 702 References

- 703 Andrade-Neto VV, Cicco NNT, Cunha-Junior EF, Canto-Cavalheiro MM, Atella GC, Torres-Santos EC. 2011.  
704 The pharmacological inhibition of sterol biosynthesis in *Leishmania* is counteracted by  
705 enhancement of LDL endocytosis. *Acta Trop* **119**:194–198.  
706 doi:10.1016/j.actatropica.2011.05.001
- 707 Bern C. 2015. Chagas' Disease. *N Engl J Med* **373**:456–466. doi:10.1056/NEJMra1410150
- 708 Bern C, Kjos S, Yabsley MJ, Montgomery SP. 2011. *Trypanosoma cruzi* and Chagas' Disease in the United  
709 States. *Clin Microbiol Rev* **24**:655–681. doi:10.1128/CMR.00005-11
- 710 Bern C, Montgomery SP, Herwaldt BL, Rassi A, Marin-Neto JA, Dantas RO, Maguire JH, Acquatella H,  
711 Morillo C, Kirchhoff LV, Gilman RH, Reyes PA, Salvatella R, Moore AC. 2007. Evaluation and  
712 Treatment of Chagas Disease in the United States: A Systematic Review. *JAMA* **298**:2171–2181.  
713 doi:10.1001/jama.298.18.2171
- 714 Buckner FS, Verlinde CL, La Flamme AC, Van Voorhis WC. 1996. Efficient technique for screening drugs  
715 for activity against *Trypanosoma cruzi* using parasites expressing beta-galactosidase. *Antimicrob*  
716 *Agents Chemother* **40**:2592–2597.
- 717 Caradonna KL, Engel JC, Jacobi D, Lee C-H, Burleigh BA. 2013. Host metabolism regulates intracellular  
718 growth of *Trypanosoma cruzi*. *Cell Host Microbe* **13**:108–117. doi:10.1016/j.chom.2012.11.011
- 719 Castro JA, Diaz de Toranzo EG. 1988. Toxic effects of nifurtimox and benznidazole, two drugs used  
720 against American trypanosomiasis (Chagas' disease). *Biomed Environ Sci* **1**:19–33.
- 721 Cazzulo JJ, de Cazzulo BM, Higa AI, Segura EL. 1979. NAD-linked glutamate dehydrogenase in  
722 *Trypanosoma cruzi*. *Comp Biochem Physiol, B* **64**:129–131. doi:10.1016/0305-0491(79)90197-4
- 723 Chatelain E. 2015. Chagas disease drug discovery: toward a new era. *J Biomol Screen* **20**:22–35.  
724 doi:10.1177/1087057114550585
- 725 Conlon BP, Rowe SE, Gandt AB, Nuxoll AS, Donegan NP, Zalis EA, Clair G, Adkins JN, Cheung AL, Lewis K.  
726 2016. Persister formation in *Staphylococcus aureus* is associated with ATP depletion. *Nat*  
727 *Microbiol* **1**:16051. doi:10.1038/nmicrobiol.2016.51
- 728 Cosentino RO, Agüero F. 2014. Genetic profiling of the isoprenoid and sterol biosynthesis pathway genes  
729 of *Trypanosoma cruzi*. *PLoS ONE* **9**:e96762. doi:10.1371/journal.pone.0096762
- 730 Cruzat V, Macedo Rogero M, Noel Keane K, Curi R, Newsholme P. 2018. Glutamine: Metabolism and  
731 Immune Function, Supplementation and Clinical Translation. *Nutrients* **10**.  
732 doi:10.3390/nu10111564
- 733 Docampo R, Moreno SN, Turrens JF, Katzin AM, Gonzalez-Cappa SM, Stoppani AO. 1981. Biochemical  
734 and ultrastructural alterations produced by miconazole and econazole in *Trypanosoma cruzi*.  
735 *Mol Biochem Parasitol* **3**:169–180. doi:10.1016/0166-6851(81)90047-5
- 736 Docampo R, Schmuñis GA. 1997. Sterol biosynthesis inhibitors: potential chemotherapeutics against  
737 Chagas disease. *Parasitol Today (Regul Ed)* **13**:129–130. doi:10.1016/s0169-4758(97)01021-1
- 738 Dröse S, Brandt U. 2008. The mechanism of mitochondrial superoxide production by the cytochrome *bc1*  
739 complex. *J Biol Chem* **283**:21649–21654. doi:10.1074/jbc.M803236200
- 740 Dumont L, Richardson MB, van der Peet P, Marapana DS, Triglia T, Dixon MWA, Cowman AF, Williams SJ,  
741 Tilley L, McConville MJ, Cobbold SA. 2019. The Metabolite Repair Enzyme Phosphoglycolate  
742 Phosphatase Regulates Central Carbon Metabolism and Fosmidomycin Sensitivity in *Plasmodium*  
743 *falciparum*. *mBio* **10**. doi:10.1128/mBio.02060-19
- 744 Dumoulin PC, Burleigh BA. 2020. Methods for the Investigation of *Trypanosoma cruzi* Amastigote  
745 Proliferation in Mammalian Host Cells. *Methods Mol Biol* **2116**:535–554. doi:10.1007/978-1-  
746 0716-0294-2\_32



- 747 Dumoulin PC, Burleigh BA. 2018. Stress-Induced Proliferation and Cell Cycle Plasticity of Intracellular  
748 *Trypanosoma cruzi* Amastigotes. *mBio* **9**. doi:10.1128/mBio.00673-18
- 749 Fridovich I. 1978. The biology of oxygen radicals. *Science* **201**:875–880. doi:10.1126/science.210504
- 750 Goad LJ, Berens RL, Marr JJ, Beach DH, Holz GG. 1989. The activity of ketoconazole and other azoles  
751 against *Trypanosoma cruzi*: biochemistry and chemotherapeutic action *in vitro*. *Mol Biochem*  
752 *Parasitol* **32**:179–189. doi:10.1016/0166-6851(89)90069-8
- 753 Grohmann U, Mondanelli G, Belladonna ML, Orabona C, Pallotta MT, Iacono A, Puccetti P, Volpi C. 2017.  
754 Amino-acid sensing and degrading pathways in immune regulation. *Cytokine Growth Factor Rev*  
755 **35**:37–45. doi:10.1016/j.cytogfr.2017.05.004
- 756 Gunatilleke SS, Calvet CM, Johnston JB, Chen C-K, Erenburg G, Gut J, Engel JC, Ang KKH, Mulvaney J,  
757 Chen S, Arkin MR, McKerrow JH, Podust LM. 2012. Diverse inhibitor chemotypes targeting  
758 *Trypanosoma cruzi* CYP51. *PLoS Negl Trop Dis* **6**:e1736. doi:10.1371/journal.pntd.0001736
- 759 Hazen KC, Stei J, Darracott C, Breathnach A, May J, Howell SA. 2005. Isolation of cholesterol-dependent  
760 *Candida glabrata* from clinical specimens. *Diagn Microbiol Infect Dis* **52**:35–37.  
761 doi:10.1016/j.diagmicrobio.2004.12.006
- 762 Hicks ND, Yang J, Zhang X, Zhao B, Grad YH, Liu L, Ou X, Chang Z, Xia H, Zhou Y, Wang S, Dong J, Sun L,  
763 Zhu Y, Zhao Y, Jin Q, Fortune SM. 2018. Clinically prevalent mutations in *Mycobacterium*  
764 *tuberculosis* alter propionate metabolism and mediate multidrug tolerance. *Nat Microbiol*  
765 **3**:1032–1042. doi:10.1038/s41564-018-0218-3
- 766 Howard SJ, Cerar D, Anderson MJ, Albarrag A, Fisher MC, Pasqualotto AC, Laverdiere M, Arendrup MC,  
767 Perlin DS, Denning DW. 2009. Frequency and evolution of Azole resistance in *Aspergillus*  
768 *fumigatus* associated with treatment failure. *Emerging Infect Dis* **15**:1068–1076.  
769 doi:10.3201/eid1507.090043
- 770 Jones EM, Colley DG, Tostes S, Lopes ER, Vnencak-Jones CL, McCurley TL. 1993. Amplification of a  
771 *Trypanosoma cruzi* DNA sequence from inflammatory lesions in human chagasic  
772 cardiomyopathy. *Am J Trop Med Hyg* **48**:348–357. doi:10.4269/ajtmh.1993.48.348
- 773 Karinch AM, Pan M, Lin CM, Strange R, Souba WW. 2001. Glutamine metabolism in sepsis and infection.  
774 *J Nutr* **131**:2535S–8S; discussion 2550S-1S. doi:10.1093/jn/131.9.2535S
- 775 Kelly SL, Lamb DC, Corran AJ, Baldwin BC, Kelly DE. 1995. Mode of action and resistance to azole  
776 antifungals associated with the formation of 14 alpha-methylergosta-8,24(28)-dien-3 beta,6  
777 alpha-diol. *Biochem Biophys Res Commun* **207**:910–915. doi:10.1006/bbrc.1995.1272
- 778 Khare S, Liu X, Stinson M, Rivera I, Groessl T, Tuntland T, Yeh V, Wen B, Molteni V, Glynne R, Supek F.  
779 2015a. Antitrypanosomal Treatment with Benznidazole Is Superior to Posaconazole Regimens in  
780 Mouse Models of Chagas Disease. *Antimicrob Agents Chemother* **59**:6385–6394.  
781 doi:10.1128/AAC.00689-15
- 782 Khare S, Nagle AS, Biggart A, Lai YH, Liang F, Davis LC, Barnes SW, Mathison CJN, Myburgh E, Gao M-Y,  
783 Gillespie JR, Liu X, Tan JL, Stinson M, Rivera IC, Ballard J, Yeh V, Groessl T, Federe G, Koh HXY,  
784 Venable JD, Bursulaya B, Shapiro M, Mishra PK, Spraggon G, Brock A, Mottram JC, Buckner FS,  
785 Rao SPS, Wen BG, Walker JR, Tuntland T, Molteni V, Glynne RJ, Supek F. 2016. Proteasome  
786 inhibition for treatment of leishmaniasis, Chagas disease and sleeping sickness. *Nature* **537**:229–  
787 233. doi:10.1038/nature19339
- 788 Khare S, Roach SL, Barnes SW, Hoepfner D, Walker JR, Chatterjee AK, Neitz RJ, Arkin MR, McNamara CW,  
789 Ballard J, Lai Y, Fu Y, Molteni V, Yeh V, McKerrow JH, Glynne RJ, Supek F. 2015b. Utilizing  
790 Chemical Genomics to Identify Cytochrome *b* as a Novel Drug Target for Chagas Disease. *PLoS*  
791 *Pathog* **11**:e1005058. doi:10.1371/journal.ppat.1005058
- 792 Kominsky DJ, Campbell EL, Colgan SP. 2010. Metabolic shifts in immunity and inflammation. *J Immunol*  
793 **184**:4062–4068. doi:10.4049/jimmunol.0903002

- 794 Lander N, Li Z-H, Niyogi S, Docampo R. 2015. CRISPR/Cas9-Induced Disruption of Paraflagellar Rod  
795 Protein 1 and 2 Genes in *Trypanosoma cruzi* Reveals Their Role in Flagellar Attachment. *mBio*  
796 **6**:e01012. doi:10.1128/mBio.01012-15
- 797 Lee BY, Bacon KM, Bottazzi ME, Hotez PJ. 2013. Global economic burden of Chagas disease: a  
798 computational simulation model. *Lancet Infect Dis* **13**:342–348. doi:10.1016/S1473-  
799 3099(13)70002-1
- 800 Lepesheva GI, Villalta F, Waterman MR. 2011. Targeting *Trypanosoma cruzi* sterol 14 $\alpha$ -demethylase  
801 (CYP51). *Adv Parasitol* **75**:65–87. doi:10.1016/B978-0-12-385863-4.00004-6
- 802 Leroux AE, Maugeri DA, Cazzulo JJ, Nowicki C. 2011. Functional characterization of NADP-dependent  
803 isocitrate dehydrogenase isozymes from *Trypanosoma cruzi*. *Mol Biochem Parasitol* **177**:61–64.  
804 doi:10.1016/j.molbiopara.2011.01.010
- 805 Lewis MD, Francisco AF, Taylor MC, Kelly JM. 2015. A new experimental model for assessing drug  
806 efficacy against *Trypanosoma cruzi* infection based on highly sensitive *in vivo* imaging. *J Biomol*  
807 *Screen* **20**:36–43. doi:10.1177/1087057114552623
- 808 Liendo A, Visbal G, Piras MM, Piras R, Urbina JA. 1999. Sterol composition and biosynthesis in  
809 *Trypanosoma cruzi* amastigotes. *Mol Biochem Parasitol* **104**:81–91. doi:10.1016/s0166-  
810 6851(99)00129-2
- 811 Lobritz MA, Belenky P, Porter CBM, Gutierrez A, Yang JH, Schwarz EG, Dwyer DJ, Khalil AS, Collins JJ.  
812 2015. Antibiotic efficacy is linked to bacterial cellular respiration. *Proc Natl Acad Sci USA*  
813 **112**:8173–8180. doi:10.1073/pnas.1509743112
- 814 Lopatkin AJ, Stokes JM, Zheng EJ, Yang JH, Takahashi MK, You L, Collins JJ. 2019. Bacterial metabolic  
815 state more accurately predicts antibiotic lethality than growth rate. *Nat Microbiol* **4**:2109–2117.  
816 doi:10.1038/s41564-019-0536-0
- 817 Lowry RR. 1968. Ferric chloride spray detector for cholesterol and cholesteryl esters on thin-layer  
818 chromatograms. *J Lipid Res* **9**:397.
- 819 MacLean LM, Thomas J, Lewis MD, Cotillo I, Gray DW, De Rycker M. 2018. Development of *Trypanosoma*  
820 *cruzi* *in vitro* assays to identify compounds suitable for progression in Chagas' disease drug  
821 discovery. *PLoS Negl Trop Dis* **12**:e0006612. doi:10.1371/journal.pntd.0006612
- 822 Matés JM, Pérez-Gómez C, Núñez de Castro I, Asenjo M, Márquez J. 2002. Glutamine and its relationship  
823 with intracellular redox status, oxidative stress and cell proliferation/death. *Int J Biochem Cell*  
824 *Biol* **34**:439–458. doi:10.1016/s1357-2725(01)00143-1
- 825 McConville MJ, Saunders EC, Kloehn J, Dagley MJ. 2015. *Leishmania* carbon metabolism in the  
826 macrophage phagolysosome- feast or famine? *F1000Res* **4**:938.  
827 doi:10.12688/f1000research.6724.1
- 828 McLean KJ, Jacobs-Lorena M. 2017. *Plasmodium falciparum* Maf1 Confers Survival upon Amino Acid  
829 Starvation. *mBio* **8**. doi:10.1128/mBio.02317-16
- 830 Molina I, Gómez i Prat J, Salvador F, Treviño B, Sulleiro E, Serre N, Pou D, Roure S, Cabezos J, Valerio L,  
831 Blanco-Grau A, Sánchez-Montalvá A, Vidal X, Pahissa A. 2014. Randomized trial of posaconazole  
832 and benznidazole for chronic Chagas' disease. *N Engl J Med* **370**:1899–1908.  
833 doi:10.1056/NEJMoa1313122
- 834 Morillo CA, Marin-Neto JA, Avezum A, Sosa-Estani S, Rassi A, Rosas F, Villena E, Quiroz R, Bonilla R, Britto  
835 C, Guhl F, Velazquez E, Bonilla L, Meeks B, Rao-Melacini P, Pogue J, Mattos A, Lazdins J, Rassi A,  
836 Connolly SJ, Yusuf S, BENEFIT Investigators. 2015. Randomized Trial of Benznidazole for Chronic  
837 Chagas' Cardiomyopathy. *N Engl J Med* **373**:1295–1306. doi:10.1056/NEJMoa1507574
- 838 Morillo CA, Waskin H, Sosa-Estani S, Del Carmen Bangher M, Cuneo C, Milesi R, Mallagray M, Apt W,  
839 Beloscar J, Gascon J, Molina I, Echeverria LE, Colombo H, Perez-Molina JA, Wyss F, Meeks B,  
840 Bonilla LR, Gao P, Wei B, McCarthy M, Yusuf S, STOP-CHAGAS Investigators. 2017. Benznidazole

- 841 and Posaconazole in Eliminating Parasites in Asymptomatic *T. Cruzi* Carriers: The STOP-CHAGAS  
842 Trial. *J Am Coll Cardiol* **69**:939–947. doi:10.1016/j.jacc.2016.12.023
- 843 Mukherjee S, Xu W, Hsu F-F, Patel J, Huang J, Zhang K. 2019. Sterol methyltransferase is required for  
844 optimal mitochondrial function and virulence in *Leishmania major*. *Mol Microbiol* **111**:65–81.  
845 doi:10.1111/mmi.14139
- 846 Murcia L, Carrilero B, Muñoz MJ, Iborra MA, Segovia M. 2010. Usefulness of PCR for monitoring  
847 benznidazole response in patients with chronic Chagas' disease: a prospective study in a non-  
848 disease-endemic country. *J Antimicrob Chemother* **65**:1759–1764. doi:10.1093/jac/dkq201
- 849 Murithi JM, Owen ES, Istvan ES, Lee MCS, Otilie S, Chibale K, Goldberg DE, Winzeler EA, Llinás M, Fidock  
850 DA, Vanaerschot M. 2020. Combining Stage Specificity and Metabolomic Profiling to Advance  
851 Antimalarial Drug Discovery. *Cell Chem Biol* **27**:158–171.e3. doi:10.1016/j.chembiol.2019.11.009
- 852 Otilie S, Goldgof GM, Calvet CM, Jennings GK, LaMonte G, Schenken J, Vigil E, Kumar P, McCall L-I, Lopes  
853 ESC, Gunawan F, Yang J, Suzuki Y, Siqueira-Neto JL, McKerrow JH, Amaro RE, Podust LM, Durrant  
854 JD, Winzeler EA. 2017. Rapid Chagas Disease Drug Target Discovery Using Directed Evolution in  
855 Drug-Sensitive Yeast. *ACS Chem Biol* **12**:422–434. doi:10.1021/acscchembio.6b01037
- 856 Peng D, Tarleton R. 2015. EuPaGDT: a web tool tailored to design CRISPR guide RNAs for eukaryotic  
857 pathogens. *Microb Genom* **1**:e000033. doi:10.1099/mgen.0.000033
- 858 Pereira MG, Visbal G, Costa TFR, Frases S, de Souza W, Atella G, Cunha-E-Silva N. 2018. *Trypanosoma*  
859 *cruzi* epimastigotes store cholesteryl esters in lipid droplets after cholesterol endocytosis. *Mol*  
860 *Biochem Parasitol* **224**:6–16. doi:10.1016/j.molbiopara.2018.07.004
- 861 Pethe K, Sequeira PC, Agarwalla S, Rhee K, Kuhen K, Phong WY, Patel V, Beer D, Walker JR, Duraiswamy  
862 J, Jiricek J, Keller TH, Chatterjee A, Tan MP, Ujjini M, Rao SPS, Camacho L, Bifani P, Mak PA, Ma I,  
863 Barnes SW, Chen Z, Plouffe D, Thayalan P, Ng SH, Au M, Lee BH, Tan BH, Ravindran S,  
864 Nanjundappa M, Lin X, Goh A, Lakshminarayana SB, Shoen C, Cynamon M, Kreiswirth B, Dartois  
865 V, Peters EC, Glynne R, Brenner S, Dick T. 2010. A chemical genetic screen in *Mycobacterium*  
866 *tuberculosis* identifies carbon-source-dependent growth inhibitors devoid of *in vivo* efficacy. *Nat*  
867 *Commun* **1**:57. doi:10.1038/ncomms1060
- 868 Pinazo M-J, Muñoz J, Posada E, López-Chejade P, Gállego M, Ayala E, del Cacho E, Soy D, Gascon J. 2010.  
869 Tolerance of benznidazole in treatment of Chagas' disease in adults. *Antimicrob Agents*  
870 *Chemother* **54**:4896–4899. doi:10.1128/AAC.00537-10
- 871 Prasad R, Rawal MK. 2014. Efflux pump proteins in antifungal resistance. *Front Pharmacol* **5**:202.  
872 doi:10.3389/fphar.2014.00202
- 873 Rassi A, Rassi A, Marin-Neto JA. 2010. Chagas disease. *Lancet* **375**:1388–1402. doi:10.1016/S0140-  
874 6736(10)60061-X
- 875 Rowe SE, Wagner NJ, Li L, Beam JE, Wilkinson AD, Radlinski LC, Zhang Q, Miao EA, Conlon BP. 2020.  
876 Reactive oxygen species induce antibiotic tolerance during systemic *Staphylococcus aureus*  
877 infection. *Nat Microbiol* **5**:282–290. doi:10.1038/s41564-019-0627-y
- 878 Sánchez-Valdéz FJ, Padilla A, Wang W, Orr D, Tarleton RL. 2018. Spontaneous dormancy protects  
879 *Trypanosoma cruzi* during extended drug exposure. *Elife* **7**. doi:10.7554/eLife.34039
- 880 Saunders EC, DE Souza DP, Naderer T, Sernee MF, Ralton JE, Doyle MA, Macrae JI, Chambers JL, Heng J,  
881 Nahid A, Likic VA, McConville MJ. 2010. Central carbon metabolism of *Leishmania* parasites.  
882 *Parasitology* **137**:1303–1313. doi:10.1017/S0031182010000077
- 883 Schumann Burkard G, Jutzi P, Roditi I. 2011. Genome-wide RNAi screens in bloodstream form  
884 trypanosomes identify drug transporters. *Mol Biochem Parasitol* **175**:91–94.  
885 doi:10.1016/j.molbiopara.2010.09.002
- 886 Shah-Simpson S, Lentini G, Dumoulin PC, Burleigh BA. 2017. Modulation of host central carbon  
887 metabolism and *in situ* glucose uptake by intracellular *Trypanosoma cruzi* amastigotes. *PLoS*  
888 *Pathog* **13**:e1006747. doi:10.1371/journal.ppat.1006747

- 889 Sharma AI, Olson CL, Mamede JI, Gazos-Lopes F, Epting CL, Almeida IC, Engman DM. 2017. Sterol  
890 targeting drugs reveal life cycle stage-specific differences in trypanosome lipid rafts. *Sci Rep*  
891 **7**:9105. doi:10.1038/s41598-017-08770-9
- 892 Shlomi T, Cabili MN, Herrgård MJ, Pálsson BØ, Ruppín E. 2008. Network-based prediction of human  
893 tissue-specific metabolism. *Nat Biotechnol* **26**:1003–1010. doi:10.1038/nbt.1487
- 894 Stanaway JD, Roth G. 2015. The burden of Chagas disease: estimates and challenges. *Glob Heart* **10**:139–  
895 144. doi:10.1016/j.gheart.2015.06.001
- 896 Tarleton RL, Zhang L, Downs MO. 1997. “Autoimmune rejection” of neonatal heart transplants in  
897 experimental Chagas disease is a parasite-specific response to infected host tissue. *Proc Natl*  
898 *Acad Sci USA* **94**:3932–3937. doi:10.1073/pnas.94.8.3932
- 899 Taylor FR, Parks LW. 1978. Metabolic interconversion of free sterols and steryl esters in *Saccharomyces*  
900 *cerevisiae*. *J Bacteriol* **136**:531–537.
- 901 Torrico F, Gascon J, Ortiz L, Alonso-Vega C, Pinazo M-J, Schijman A, Almeida IC, Alves F, Strub-Wourgaft  
902 N, Ribeiro I, E1224 Study Group. 2018. Treatment of adult chronic indeterminate Chagas disease  
903 with benznidazole and three E1224 dosing regimens: a proof-of-concept, randomised, placebo-  
904 controlled trial. *Lancet Infect Dis* **18**:419–430. doi:10.1016/S1473-3099(17)30538-8
- 905 Urbina JA. 1997. Lipid biosynthesis pathways as chemotherapeutic targets in kinetoplastid parasites.  
906 *Parasitology* **114 Suppl**:S91-99.
- 907 Urbina JA, Docampo R. 2003. Specific chemotherapy of Chagas disease: controversies and advances.  
908 *Trends Parasitol* **19**:495–501. doi:10.1016/j.pt.2003.09.001
- 909 Vestergaard M, Nøhr-Meldgaard K, Bojer MS, Krosgård Nielsen C, Meyer RL, Slavetinsky C, Peschel A,  
910 Ingmer H. 2017. Inhibition of the ATP Synthase Eliminates the Intrinsic Resistance of  
911 *Staphylococcus aureus* towards Polymyxins. *mBio* **8**. doi:10.1128/mBio.01114-17
- 912 Viotti R, Vigliano C, Lococo B, Alvarez MG, Petti M, Bertocchi G, Armenti A. 2009. Side effects of  
913 benznidazole as treatment in chronic Chagas disease: fears and realities. *Expert Rev Anti Infect*  
914 *Ther* **7**:157–163. doi:10.1586/14787210.7.2.157
- 915 WHO. 2015. Chagas disease in Latin America: an epidemiological update based on 2010 estimates.  
916 *Wkly Epidemiol Rec* **90**:33–43.
- 917 Xu W, Hsu F-F, Baykal E, Huang J, Zhang K. 2014. Sterol biosynthesis is required for heat resistance but  
918 not extracellular survival in *Leishmania*. *PLoS Pathog* **10**:e1004427.  
919 doi:10.1371/journal.ppat.1004427
- 920 Yang JH, Bening SC, Collins JJ. 2017. Antibiotic efficacy-context matters. *Curr Opin Microbiol* **39**:73–80.  
921 doi:10.1016/j.mib.2017.09.002
- 922 Yeh E, DeRisi JL. 2011. Chemical rescue of malaria parasites lacking an apicoplast defines organelle  
923 function in blood-stage *Plasmodium falciparum*. *PLoS Biol* **9**:e1001138.  
924 doi:10.1371/journal.pbio.1001138
- 925 Zhang L, Tarleton RL. 1999. Parasite persistence correlates with disease severity and localization in  
926 chronic Chagas’ disease. *J Infect Dis* **180**:480–486. doi:10.1086/314889
- 927 Zonios DI, Bennett JE. 2008. Update on azole antifungals. *Semin Respir Crit Care Med* **29**:198–210.  
928 doi:10.1055/s-2008-1063858  
929

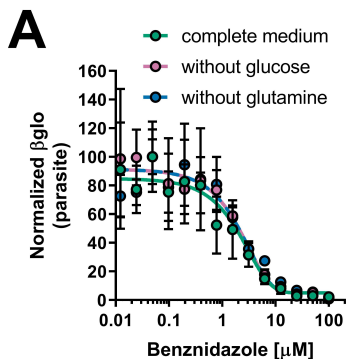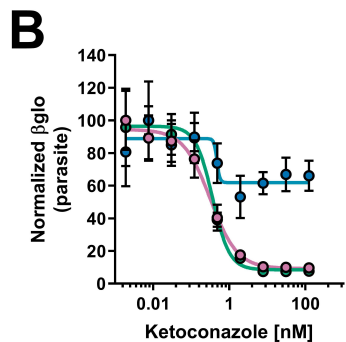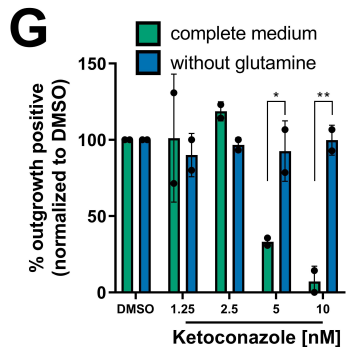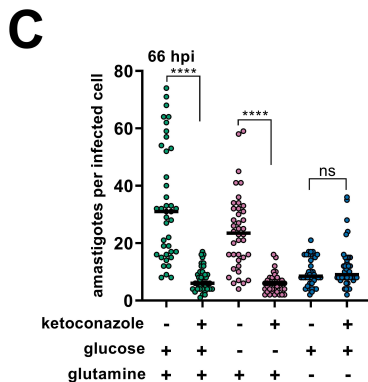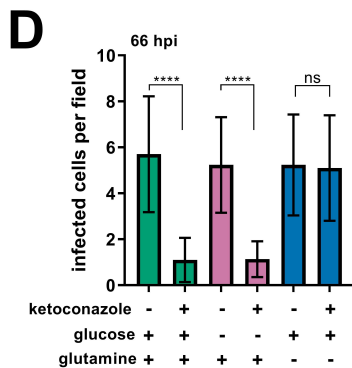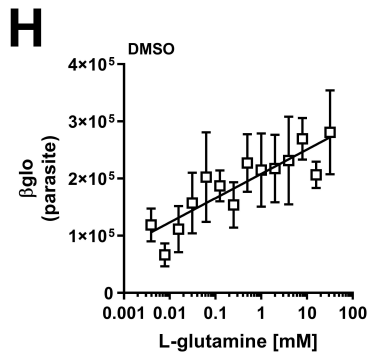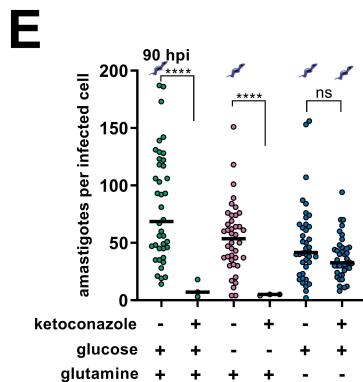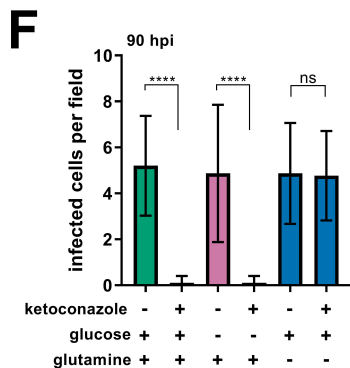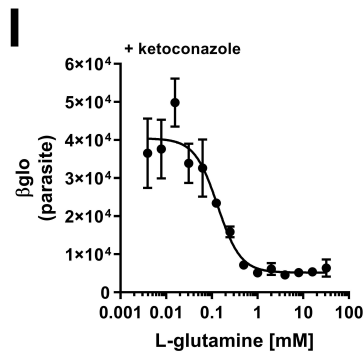

**A**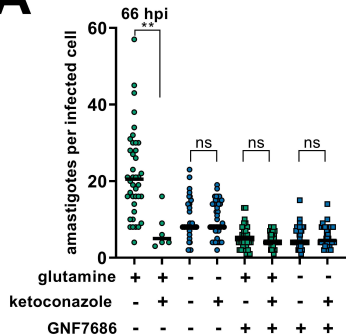**B**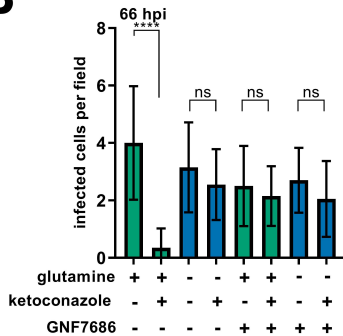**C**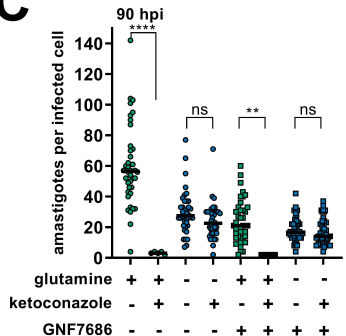**D**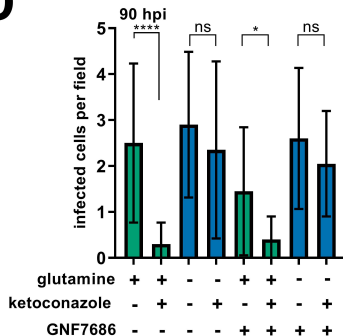

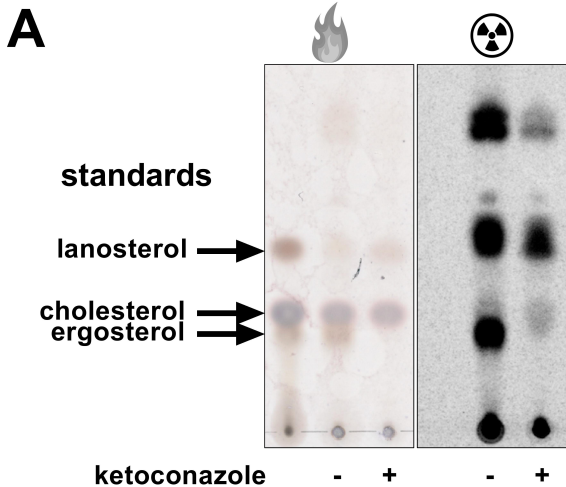

**B**

| Sample                             | Sterols                          | RT [min] | natural sterols (%) | <sup>13</sup> C-sterols enrichment (%) | <sup>13</sup> C2-sterols enrichment (%) | <sup>13</sup> C3-sterols enrichment (%) |
|------------------------------------|----------------------------------|----------|---------------------|----------------------------------------|-----------------------------------------|-----------------------------------------|
| Complete medium                    | zymosterol's isomer              | 12.62    | 77                  | 23                                     | 0                                       | 0                                       |
|                                    | ergosterol's isomer              | 12.79    | 78                  | 17                                     | 6                                       | 0                                       |
|                                    | lanosterol                       | 13.04    | 71                  | 16                                     | 12                                      | 1                                       |
|                                    | 4-methyl-8,24-cholestadienol     | 12.83    | 73                  | 15                                     | 12                                      | 0                                       |
|                                    | 4,4-dimethyl-8,24-cholestadienol | 13.14    | 74                  | 15                                     | 11                                      | 0                                       |
|                                    | 4-methyl-8,24-cholestadienol     | 12.72    | 86                  | 14                                     | 0                                       | 0                                       |
|                                    | zymosterol                       | 12.46    | 89                  | 11                                     | 0                                       | 0                                       |
|                                    | episterol                        | 12.88    | 91                  | 9                                      | 0                                       | 0                                       |
|                                    | 14-methyl fecosterol's isomer    | 13.22    | 86                  | 8                                      | 5                                       | 0                                       |
|                                    | ebericol                         | 13.30    | -                   | -                                      | -                                       | -                                       |
| Complete medium + ketoconazole 5nM | cholesterol                      | 12.21    | 100                 | 0                                      | 0                                       | 0                                       |
|                                    | ebericol                         | 13.30    | 66                  | 17                                     | 14                                      | 2                                       |
|                                    | lanosterol                       | 13.04    | 77                  | 11                                     | 11                                      | 1                                       |
|                                    | C34H58OSi                        | 13.20    | 86                  | 14                                     | 0                                       | 0                                       |
|                                    | cholesterol                      | 12.21    | 100                 | 0                                      | 0                                       | 0                                       |

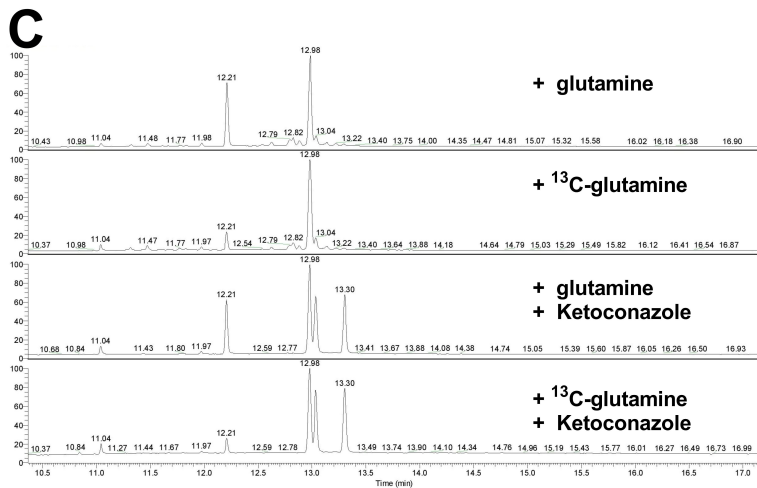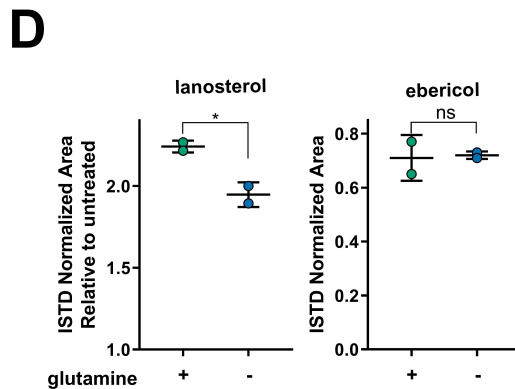

**A**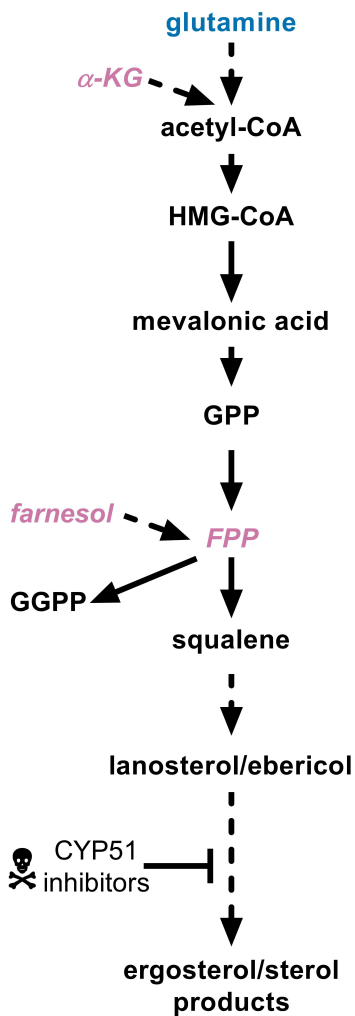**B**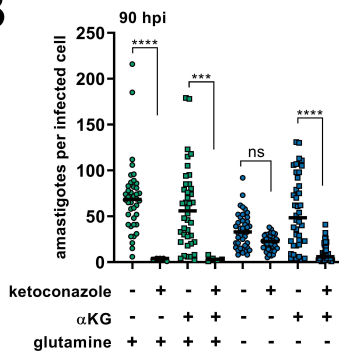**C**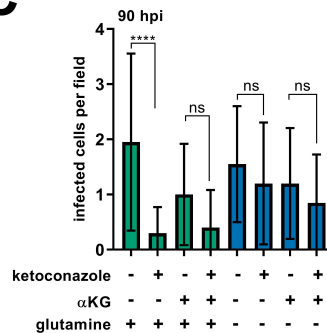**D**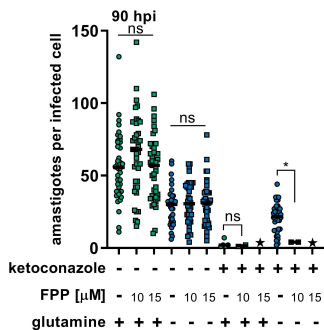**E**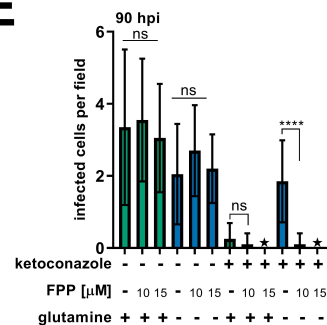**F**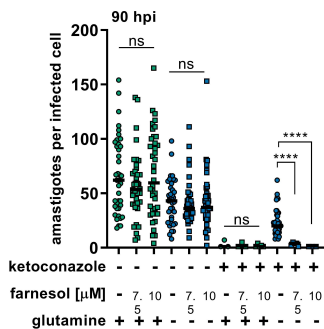**G**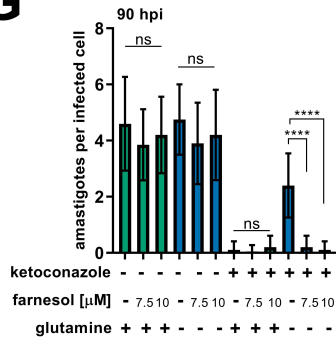



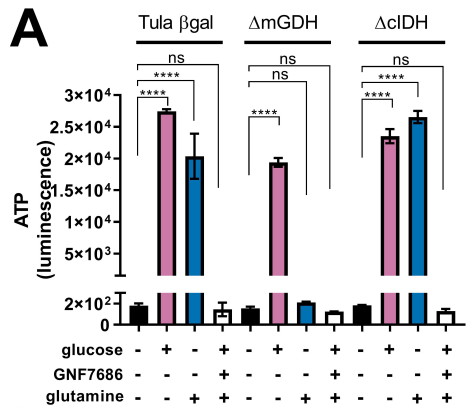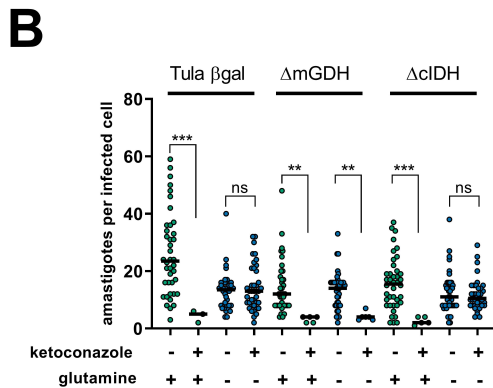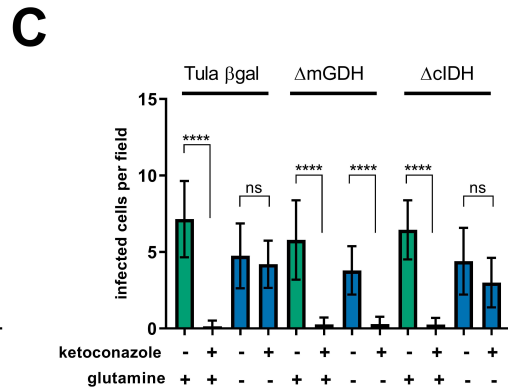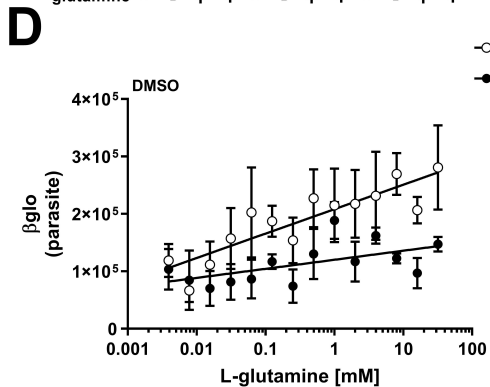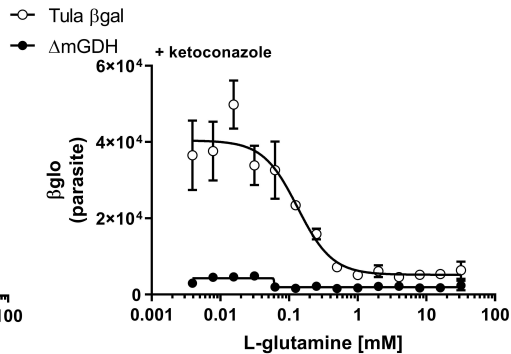

Source: https://www.biorxiv.org/content/10.1101/2020.06.19.161638v1.full.pdf
